# Supplementary material
Source: PubMed Central journal article supplement (PMC4120849)
Supplement: NIHMS531964-supplement-Supp_Figure_S1-11___Table_S1-S2.pdf [file NIHMS531964-supplement-Supp_Figure_S1-11___Table_S1-S2.pdf]

## **SUPPLEMENTAL INFORMATION (SI)**

### **Requirement of Essential Pbp2x and GpsB for Septal Ring Closure in**

### ***Streptococcus pneumoniae* D39**

Adrian D. Land<sup>†1</sup>, Ho-Ching T. Tsui<sup>†\*1</sup>, Ozden Kocaoglu<sup>2</sup>, Stephen Vella<sup>1</sup>, Sidney L. Shaw<sup>1</sup>, Susan K. Keen<sup>1</sup>, Lok-To Sham<sup>1</sup>, Erin E. Carlson<sup>2,3</sup>, and Malcolm E. Winkler<sup>\*1</sup>

Departments of Biology<sup>1</sup>, Molecular and Cellular Biochemistry<sup>2</sup>, and Chemistry<sup>3</sup>, Indiana  
University Bloomington,  
Bloomington, IN 47405

<sup>†</sup>Contributed equally to this work.\*Co-corresponding authors.

\*Co-corresponding authors

**SUPPLEMENTAL Table S1.** Bacterial strains used in this study

**SUPPLEMENTAL TABLE S2.** Oligonucleotide primers used in this study

**SUPPLEMENTAL MOVIE LEGENDS:** Movies S1-S6

**REFERNECES TO SUPPLEMENTAL INFORMATION**

**SUPPLEMENTAL FIGURE LEGENDS:** Fig. S1-S11

**SUPPLEMENTAL FIGURES:** Fig. S1-S11

**Table S1.** Bacterial strains used in this study<sup>a</sup>

| <b><i>S. pneumoniae</i> strains</b> |                                                                                                                                                                                            |                                                    |                              |
|-------------------------------------|--------------------------------------------------------------------------------------------------------------------------------------------------------------------------------------------|----------------------------------------------------|------------------------------|
| Strain number                       | Genotype (description) <sup>b</sup>                                                                                                                                                        | Antibiotic resistance <sup>c</sup>                 | Reference or source          |
| E177                                | D39 $\Delta cps \Delta pbp1a::P_c-erm$ (IU1945 transformed with fusion amplicon $\Delta pbp1a::P_c-erm$ )                                                                                  | Erm <sup>R</sup>                                   | (Land & Winkler, 2011)       |
| E180                                | D39 $\Delta cps \Delta pbp2a::P_c-erm$ (IU1945 transformed with fusion amplicon $\Delta pbp2a::P_c-erm$ )                                                                                  | Erm <sup>R</sup>                                   | (Land & Winkler, 2011)       |
| E193                                | D39 $\Delta cps \Delta pbp1b::P_c-erm$ (IU1945 transformed with fusion amplicon $\Delta pbp1b::P_c-erm$ )                                                                                  | Erm <sup>R</sup>                                   | (Land & Winkler, 2011)       |
| IU1945                              | D39 $\Delta cps$                                                                                                                                                                           | None                                               | (Lanie <i>et al.</i> , 2007) |
| IU3238                              | R6 $mreC-L-FLAG^3 - P_c-erm$                                                                                                                                                               | Erm <sup>R</sup>                                   | (Land & Winkler, 2011)       |
| IU4846                              | D39 $\Delta cps \Delta bgaA::kan-t1t2-P_{fcsK^-}gpsB$ (IU1945 transformed with fusion $\Delta bgaA::kan-t1t2-P_{fcsK^-}gpsB$ amplicon)                                                     | Kan <sup>R</sup>                                   | This study                   |
| IU4888                              | D39 $\Delta cps \Delta gpsB \langle \rangle aad9 // \Delta bgaA::kan-t1t2-P_{fcsK^-}gpsB$ (IU4846 transformed with fusion $\Delta gpsB \langle \rangle aad9$ amplicon)                     | Kan <sup>R</sup> Spc <sup>R</sup>                  | This study                   |
| IU4970                              | D39 $\Delta cps mreC-L-FLAG^3 - P_c-erm$                                                                                                                                                   | Erm <sup>R</sup>                                   | (Land & Winkler, 2011)       |
| IU4972                              | D39 $\Delta cps \Delta pbp2a::P_c-erm \Delta gpsB \langle \rangle aad9 // \Delta bgaA::kan-t1t2-P_{fcsK^-}gpsB$ (IU4888 transformed with $\Delta pbp2a::P_c-erm$ amplicon from E180)       | Kan <sup>R</sup> Erm <sup>R</sup> Spc <sup>R</sup> | This study                   |
| IU4974                              | D39 $\Delta cps \Delta pbp1b::P_c-erm \Delta gpsB \langle \rangle aad9 // \Delta bgaA::kan-t1t2-P_{fcsK^-}gpsB$ (IU4888 transformed with $\Delta pbp1b::P_c-erm$ amplicon from E193)       | Kan <sup>R</sup> Erm <sup>R</sup> Spc <sup>R</sup> | This study                   |
| IU4976                              | D39 $\Delta cps \Delta gpsB \langle \rangle aad9 // \Delta bgaA::kan-t1t2-P_{fcsK^-}gpsB mreC-L-FLAG^3 - P_c-erm$ (IU4888 transformed with $mreC-L-FLAG^3 - P_c-erm$ amplicon from IU3238) | Kan <sup>R</sup> Erm <sup>R</sup> Spc <sup>R</sup> | This study                   |
| IU4978                              | D39 $\Delta cps \Delta pbp1a::P_c-erm \Delta gpsB \langle \rangle aad9 // \Delta bgaA::kan-t1t2-P_{fcsK^-}gpsB$ (IU4888 transformed with                                                   | Kan <sup>R</sup> Erm <sup>R</sup> Spc <sup>R</sup> | This study                   |

|        |                                                                                                                                                                                                                                        |                                                       |            |
|--------|----------------------------------------------------------------------------------------------------------------------------------------------------------------------------------------------------------------------------------------|-------------------------------------------------------|------------|
|        | $\Delta pbp1a::P_c$ -erm amplicon from E177)                                                                                                                                                                                           |                                                       |            |
| IU5458 | D39 $\Delta cps$ <i>gpsB</i> -L-FLAG <sup>3</sup> -P <sub>c</sub> -erm (IU1945 transformed with fusion <i>gpsB</i> -L-FLAG <sup>3</sup> -P <sub>c</sub> -erm amplicon)                                                                 | Erm <sup>R</sup>                                      | This study |
| IU5544 | D39 $\Delta cps$ <i>pbp1a</i> -L-FLAG <sup>3</sup> -P <sub>c</sub> -erm (IU1945 transformed with fusion <i>pbp1a</i> -L-FLAG <sup>3</sup> -P <sub>c</sub> -erm amplicon)                                                               | Erm <sup>R</sup>                                      | This study |
| IU5838 | D39 $\Delta cps$ <i>gpsB</i> -FLAG-P <sub>c</sub> -erm (IU1945 transformed with fusion <i>gpsB</i> -FLAG-P <sub>c</sub> -erm amplicon)                                                                                                 | Erm <sup>R</sup>                                      | This study |
| IU5840 | D39 $\Delta cps$ <i>pbp1a</i> -FLAG-P <sub>c</sub> -erm (IU1945 transformed with fusion <i>pbp1a</i> -FLAG-P <sub>c</sub> -erm amplicon)                                                                                               | Erm <sup>R</sup>                                      | This study |
| IU5846 | D39 $\Delta cps$ $\Delta gpsB$ <> <i>aad9</i> // $\Delta bgaA::kan$ -t1t2-P <sub>fcsk</sub> - <i>gpsB</i> (IU4846 transformed with $\Delta gpsB$ <> <i>aad9</i> amplicon from IU4888)                                                  | Kan <sup>R</sup> Spc <sup>R</sup>                     | This study |
| IU5847 | D39 $\Delta cps$ $\Delta gpsB$ <> <i>aad9</i> // $\Delta bgaA::kan$ -t1t2-P <sub>fcsk</sub> - <i>gpsB</i> (IU4846 transformed with $\Delta gpsB$ <> <i>aad9</i> amplicon from IU4888)                                                  | Kan <sup>R</sup> Spc <sup>R</sup>                     | This study |
| IU5980 | D39 $\Delta cps$ $\Delta gpsB$ <> <i>aad9</i> // $\Delta bgaA::kan$ -t1t2-P <sub>fcsk</sub> - <i>gpsB</i> <i>pbp1a</i> -FLAG-P <sub>c</sub> -erm (IU4888 transformed with <i>pbp1a</i> -FLAG-P <sub>c</sub> -erm amplicon from IU5840) | Kan <sup>R</sup> Erm <sup>R</sup><br>Spc <sup>R</sup> | This study |
| IU6506 | D39 $\Delta cps$ <i>pbp2x</i> -L-FLAG <sup>3</sup> -P <sub>c</sub> -erm (IU1945 transformed with fusion <i>pbp2x</i> -L-FLAG <sup>3</sup> -P <sub>c</sub> -erm amplicon)                                                               | Erm <sup>R</sup>                                      | This study |
| IU6565 | D39 $\Delta cps$ <i>ftsZ</i> -FLAG-P <sub>c</sub> -erm (IU1945 transformed with fusion <i>ftsZ</i> -FLAG-P <sub>c</sub> -erm amplicon)                                                                                                 | Erm <sup>R</sup>                                      | This study |
| IU6570 | D39 $\Delta cps$ <i>ftsZ</i> -Myc-P <sub>c</sub> -erm (IU1945 transformed with fusion <i>ftsZ</i> -Myc-P <sub>c</sub> -erm amplicon)                                                                                                   | Erm <sup>R</sup>                                      | This study |
| IU6819 | D39 $\Delta cps$ <i>pbp2x</i> -FLAG <sup>3</sup> -P <sub>c</sub> -erm (IU1945 transformed with fusion <i>pbp2x</i> -FLAG <sup>3</sup> -P <sub>c</sub> -erm amplicon)                                                                   | Erm <sup>R</sup>                                      | This study |
| IU6929 | D39 $\Delta cps$ <i>pbp2x</i> -HA-P <sub>c</sub> -kan (IU1945 transformed with fusion <i>pbp2x</i> -HA-P <sub>c</sub> -kan)                                                                                                            | Kan <sup>R</sup>                                      | This study |
| IU6944 | D39 $\Delta cps$ $\Delta gpsB$ <> <i>aad9</i> // $\Delta bgaA::kan$ -t1t2-P <sub>fcsk</sub> - <i>gpsB</i> <i>ftsZ</i> -FLAG-P <sub>c</sub> -erm (IU4888 transformed with <i>ftsZ</i> -FLAG-                                            | Kan <sup>R</sup> Erm <sup>R</sup><br>Spc <sup>R</sup> | This study |

|        |                                                                                                                                                                                                                      |                                                       |            |
|--------|----------------------------------------------------------------------------------------------------------------------------------------------------------------------------------------------------------------------|-------------------------------------------------------|------------|
|        | P <sub>c</sub> -erm amplicon from IU6565)                                                                                                                                                                            |                                                       |            |
| IU6946 | D39 $\Delta cps \Delta gpsB \langle \rightarrow aad9 // \Delta bgaA :: kan-t1t2-P_{icsk} - gpsB ftsZ-Myc-P_c-erm$ (IU4888 transformed with <i>ftsZ-Myc-P<sub>c</sub>-erm</i> amplicon from IU6570)                   | Kan <sup>R</sup> Erm <sup>R</sup><br>Spc <sup>R</sup> | This study |
| IU6962 | D39 $\Delta cps ftsZ-Myc-P_c-kan$ (IU1945 transformed with fusion <i>ftsZ-Myc-P<sub>c</sub>-kan</i> amplicon)                                                                                                        | Kan <sup>R</sup>                                      | This study |
| IU6964 | D39 $\Delta cps gpsB-FLAG-P_c-erm ftsZ-Myc-P_c-kan$ (IU5838 transformed with fusion <i>ftsZ-Myc-P<sub>c</sub>-kan</i> amplicon)                                                                                      | Kan <sup>R</sup> Erm <sup>R</sup>                     | This study |
| IU6976 | D39 $\Delta cps ftsZ-Myc-P_c-kan pbp1a-FLAG-P_c-erm$ (IU6962 transformed with <i>pbp1a-FLAG-P<sub>c</sub>-erm</i> amplicon from IU5840)                                                                              | Kan <sup>R</sup> Erm <sup>R</sup>                     | This study |
| IU6978 | D39 $\Delta cps ftsZ-Myc-P_c-kan pbp2x-FLAG^3-P_c-erm$ (IU6962 transformed with <i>pbp2x-FLAG<sup>3</sup>-P<sub>c</sub>-erm</i> amplicon from IU6819)                                                                | Kan <sup>R</sup> Erm <sup>R</sup>                     | This study |
| IU6980 | D39 $\Delta cps \Delta gpsB \langle \rightarrow aad9 // \Delta bgaA :: kan-t1t2-P_{icsk} - gpsB pbp2x-FLAG^3-P_c-erm$ (IU4888 transformed with <i>pbp2x-FLAG<sup>3</sup>-P<sub>c</sub>-erm</i> amplicon from IU6819) | Kan <sup>R</sup> Erm <sup>R</sup><br>Spc <sup>R</sup> | This study |
| IU7199 | D39 $\Delta cps gpsB-Myc-P_c-erm$ (IU1945 transformed with fusion <i>gpsB-Myc-P<sub>c</sub>-erm</i> amplicon)                                                                                                        | Erm <sup>R</sup>                                      | This study |
| IU7365 | D39 $\Delta cps pbp2x-HA-P_c-kan pbp1a-L-FLAG^3-P_c-erm$ (IU5544 transformed with <i>pbp2x-HA-P<sub>c</sub>-kan</i> amplicon from IU6929)                                                                            | Kan <sup>R</sup> Erm <sup>R</sup>                     | This study |

<sup>a</sup>Strains were constructed as described in *Experimental procedures*.

<sup>b</sup>Primers used to synthesize fusion amplicons are listed in Supplemental Table S2.

All FLAG-tagged (FLAG), c-Myc-tagged (Myc), and HA-tagged (HA) fusions were made to the carboxyl-ends of reading frames. The amino acid sequence for the FLAG epitope is DYKDDDDK (Hopp *et al.*, 1988; Wayne *et al.*, 2010). FLAG<sup>3</sup> indicates three tandem sequences of the FLAG epitope and L refers to a 10-amino-acid spacer linker

6 (GSAGSAAGSG) (Waldo *et al.*, 1999; Wayne *et al.*, 2010)). The amino acid sequence  
7 of the c-Myc epitope is EQKLISEEDL (Evan *et al.*, 1985), and the amino acid sequence  
8 of the HA epitope is YPYDVPDYA (Tu *et al.* 2008).

9 <sup>c</sup>Antibiotic resistance markers: Erm<sup>R</sup>, erythromycin; Kan<sup>R</sup>, kanamycin; Spc<sup>R</sup>,  
10 spectinomycin.

11  
12

**SUPPLEMENTAL TABLE S2.** Oligonucleotide primers used in this study (order follows Table S1)

| Primer                                                                               | Sequence (5' to 3')                                                | Template <sup>a</sup>                     | Amplicon Product                                    |
|--------------------------------------------------------------------------------------|--------------------------------------------------------------------|-------------------------------------------|-----------------------------------------------------|
| <b>For construction of E177 (<math>\Delta</math><i>pbp1a</i>::P<sub>c</sub>-erm)</b> |                                                                    |                                           |                                                     |
| P234                                                                                 | CCCTTGTGTTTCATAGCGAGGATAAGCA                                       | D39                                       | 5' upstream fragment with 60nt of 5' <i>pbp1a</i>   |
| P236                                                                                 | CATTATCCATTA AAAAATCAAACGGATCCTACA<br>AGCTTAAGAAGCTAATGCTCAGATACTT |                                           |                                                     |
| Kan rpsL forward                                                                     | TAGGATCCGTTTGATTTTTAATGGATAATG                                     | P <sub>c</sub> -erm cassette <sup>b</sup> | P <sub>c</sub> -erm                                 |
| Kan rpsL reverse                                                                     | GGGCCCTTTTCCTTATGCTTTTG                                            |                                           |                                                     |
| P237                                                                                 | CAAAGCATAAGGAAAGGGGCCCAACAATC<br>AAATACAACCCTGATCAACAAAATC         | D39                                       | 60 nt of 3' <i>pbp1a</i> and 3' downstream fragment |
| P235                                                                                 | AGGCAAGCCTGCAACCATGGTCTTGAAA                                       |                                           |                                                     |
| <b>For construction of E180 (<math>\Delta</math><i>pbp2a</i>::P<sub>c</sub>-erm)</b> |                                                                    |                                           |                                                     |
| P226                                                                                 | GGTACGACAACGAAATGTCATACACTGCAC                                     | D39                                       | 5' upstream fragment with 60nt of 5' <i>pbp2a</i>   |
| P228                                                                                 | CATTATCCATTA AAAAATCAAACGGATCCTATT<br>CACTTGTTTCTTTTTTAAAAAGAGAAAG |                                           |                                                     |
| Kan rpsL forward                                                                     | TAGGATCCGTTTGATTTTTAATGGATAATG                                     | P <sub>c</sub> -erm cassette <sup>b</sup> | P <sub>c</sub> -erm                                 |
| Kan rpsL reverse                                                                     | GGGCCCTTTTCCTTATGCTTTTG                                            |                                           |                                                     |
| P229                                                                                 | CAAAGCATAAGGAAAGGGGCCCGCGAAGA<br>TTAAGGAAAAGGCTCAAACAATATG         | D39                                       | 60 nt of 3' <i>pbp2a</i> and 3' downstream fragment |
| P227                                                                                 | TCTGTTCCCGTGTGATCCGACAAATCCT                                       |                                           |                                                     |
| <b>For construction of E193 (<math>\Delta</math><i>pbp1b</i>::P<sub>c</sub>-erm)</b> |                                                                    |                                           |                                                     |
| P222                                                                                 | CGTTCGTGTGGCGCTGCTTCAAATTGTT                                       | D39                                       | 5' upstream fragment with 100nt of 5' <i>pbp1b</i>  |
| P456                                                                                 | CATTATCCATTA AAAAATCAAACGGATCCTATT<br>GAACCTTTCTTGCCAGGTCTAGCTGATT |                                           |                                                     |
| Kan rpsL forward                                                                     | TAGGATCCGTTTGATTTTTAATGGATAATG                                     | P <sub>c</sub> -erm cassette <sup>b</sup> | P <sub>c</sub> -erm                                 |
| Kan rpsL reverse                                                                     | GGGCCCTTTTCCTTATGCTTTTG                                            |                                           |                                                     |
| P225                                                                                 | CAAAGCATAAGGAAAGGGGCCCTCTAGCGA<br>TAGCAGTAACTCAAGTACTACACGACCTT    | D39                                       | 60 nt of 3' <i>pbp1b</i> and 3' downstream fragment |
| P223                                                                                 | ACTGGCACTGATAACGGCAACCACCAAAA                                      |                                           |                                                     |

| <b>For construction of IU4846 (<math>\Delta bgaA::P_c\text{-kan t1t2-P}_{fcsk}\text{-gpsB}</math>)</b> |                                                                   |                     |                                                                     |
|--------------------------------------------------------------------------------------------------------|-------------------------------------------------------------------|---------------------|---------------------------------------------------------------------|
| KG067                                                                                                  | TCTTGTCGGTGTGTTGAAAATTATCAACTC                                    | IU3348 <sup>c</sup> | <i>bgaA</i> '-P <sub>c</sub> -<br><i>kan t1t2-P</i> <sub>fcsk</sub> |
| AL310                                                                                                  | TAATACTTGCCATTTTTCTTCTCTCTCGTCC                                   |                     |                                                                     |
| AL311                                                                                                  | GAGAGAAGAAAAATGGCAAGTATTATTTT<br>TTCAG                            | D39                 | <i>gpsB</i>                                                         |
| AL312                                                                                                  | GTAAGTTCTTTTATTA AAAAATCTGAGTTATC                                 |                     |                                                                     |
| AL313                                                                                                  | CTCAGATTTTTAATAAAAGAACTTACTTTC                                    | IU3348 <sup>c</sup> | <i>bgaA</i> '                                                       |
| XX043                                                                                                  | GGCTATCTTCTCCACTATCTACCACAG                                       |                     |                                                                     |
| <b>For construction of IU4888 (<math>\Delta gpsB\langle \rangle aad9</math>)</b>                       |                                                                   |                     |                                                                     |
| AL298                                                                                                  | GAGGGAAGGCACCAGCCTTGATTTC A                                       | D39                 | 5'-flanking<br>fragment                                             |
| AL314                                                                                                  | CAAATATATCCTCCTCACGTCTCTCTCCATTC                                  |                     |                                                                     |
| AL315                                                                                                  | CTAGCAAGCGAGAATGGAGAGAGACGT<br>GAGGAGG                            | IU3931 <sup>d</sup> | <i>aad9</i>                                                         |
| AL317                                                                                                  | CTCAAATAACTACTAATTTTTTTAATCTG                                     |                     |                                                                     |
| AL316                                                                                                  | GATTA AAAAAATTAGTAGTTATTTGAGAT<br>GTGC                            | D39                 | 3'-flanking<br>fragment                                             |
| AL301                                                                                                  | CGTTTAAAGAGGCTAGACCCGGTCGTATC                                     |                     |                                                                     |
| <b>For construction of IU5458 (<i>gpsB</i>-L-FLAG<sup>3</sup>-P<sub>c</sub>-erm)</b>                   |                                                                   |                     |                                                                     |
| TT196                                                                                                  | GCCAAGCCCTGAGACAAATAGTAGTCGTTGGT                                  | D39                 | 5'-flanking<br>fragment                                             |
| TT198                                                                                                  | CGGAGCCAGCGGAACCAAAATCTGAGTTATCT<br>AAAATTTGTTTACCAAAAAC          |                     |                                                                     |
| AL355                                                                                                  | CTCAGATTTTGGTTCCGCTGGCTCCG                                        | IU3238 <sup>e</sup> | L-FLAG <sup>3</sup> -P <sub>c</sub> -<br><i>erm</i>                 |
| TT199                                                                                                  | AAATTGCACATCTCAAATAACTACTTTCTCC<br>GTTAAATAATAGATAACTATTA AAAAT   |                     |                                                                     |
| TT200                                                                                                  | TAGTTATCTATTATTTAACGGGAGGAAAGTAGT<br>TATTTGAGATGTGCAATTTTTGGATAA  | D39                 | 3'-flanking<br>fragment                                             |
| TT197                                                                                                  | TTTGATACGATCTGCTGCCCGAAGCCAAAGGT                                  |                     |                                                                     |
| <b>For construction of IU5544 (<i>pbp1a</i>-L-FLAG<sup>3</sup>-P<sub>c</sub>-erm)</b>                  |                                                                   |                     |                                                                     |
| TT225                                                                                                  | AGCCGTGGAACTCTAAACAAGGTCGGACT                                     | D39                 | 5'-flanking<br>fragment                                             |
| TT226                                                                                                  | CGGAGCCAGCGGAACCTGGTTGTGCTGGTTG<br>AGGATTCTG                      |                     |                                                                     |
| AL304                                                                                                  | CCAGCACAACCAGGTTCCGCTGGCTCCGC                                     | IU3238 <sup>e</sup> | L-FLAG <sup>3</sup> -P <sub>c</sub> -<br><i>erm</i>                 |
| TT227                                                                                                  | CAGAAAAATCTGGATGATAAATGTTATTTCTC<br>CCGTTAAATAATAGATAACTATTA AAAA |                     |                                                                     |
| TT228                                                                                                  | TAGTTATCTATTATTTAACGGGAGGAAATAACA<br>TTTATCATCCAGATTTTTCTGGGTG    | D39                 | 3'-flanking<br>fragment                                             |
| P235                                                                                                   | AGGCAAGCCTGCAACCATGGTCTTGAAA                                      |                     |                                                                     |
| <b>For construction of IU5838 (<i>gpsB</i>-FLAG-P<sub>c</sub>-erm)</b>                                 |                                                                   |                     |                                                                     |
| TT196                                                                                                  | GCCAAGCCCTGAGACAAATAGTAGTCGTTGGT                                  | D39                 | 5'-flanking<br>fragment                                             |
| TT262                                                                                                  | TTATTTATCATCATCTTTATAATCAAAATCT<br>GAGTTATCTAAAATTTGTTTACCAA      |                     |                                                                     |

|                                                                                                     |                                                                    |                     |                                                         |
|-----------------------------------------------------------------------------------------------------|--------------------------------------------------------------------|---------------------|---------------------------------------------------------|
| TT263                                                                                               | TAACTCAGATTTTGATTATAAAGATGATGATGA<br>TAAATAACCGGGCCCAAATTTGTTTG    | IU5458 <sup>f</sup> | 3'-flanking<br>fragment                                 |
| TT197                                                                                               | TTTGATACGATCTGCTGCCCGAAGCCAAAGGT                                   |                     |                                                         |
| <b>For construction of IU5840 (<i>pbp1a</i>-FLAG-<i>P<sub>c</sub></i>-<i>erm</i>)</b>               |                                                                    |                     |                                                         |
| TT225                                                                                               | AGCCGTGGAAACTCTAAACAAGGTCGGACT                                     | D39                 | 5'-flanking<br>fragment                                 |
| TT264                                                                                               | TGGGCCCGGTTATTTATCATCATCATCTTTATA<br>ATCTGGTTGTGCTGGTTGAGGATTCTG   |                     |                                                         |
| TT265                                                                                               | ACCAGCACAACCAGATTATAAAGATGATGATG<br>ATAAATAACCGGGCCCAAATTTGTTTG    | IU5544 <sup>f</sup> | 3'-flanking<br>fragment                                 |
| P235                                                                                                | AGGCAAGCCTGCAACCATGGTCTTGAAA                                       |                     |                                                         |
| <b>For construction of IU6506 (<i>pbp2x</i>-L-FLAG<sup>3</sup>-<i>P<sub>c</sub></i>-<i>erm</i>)</b> |                                                                    |                     |                                                         |
| TT345                                                                                               | GTGACCCAGACGCAAATGATTTCGTGCCTTT                                    | D39                 | 5'-flanking<br>fragment                                 |
| TT347                                                                                               | CGGAGCCAGCGGAACCGTCTCCTAAAGTTAA<br>TGTAATTTTTTAAATGTCCTTG          |                     |                                                         |
| TT348                                                                                               | CATTAAAAAATTACATTAACCTTAGGAGACG<br>GTTCCGCTGGCTCCGC                | IU5544 <sup>f</sup> | L-FLAG <sup>3</sup> - <i>P<sub>c</sub></i> - <i>erm</i> |
| TT349                                                                                               | CTGATGGAAATAAACATATTATTATTTCCCTCC<br>CGTTAAATAATAGATAACTATTAATAAAT |                     |                                                         |
| TT350                                                                                               | ATAGTTATCTATTATTTAACGGGAGGAAATAA<br>TAATATGTTTATTTCCATCAGTGCTGGA   | D39                 | 3'-flanking<br>fragment                                 |
| TT346                                                                                               | AGAAGTCAACCTTCCACTCGCTCCAAGGAT                                     |                     |                                                         |
| <b>For construction of IU6565 (<i>ftsZ</i>-FLAG-<i>P<sub>c</sub></i>-<i>erm</i>)</b>                |                                                                    |                     |                                                         |
| TT165                                                                                               | AGTGGTGCCGATATGGTCTTCATCACTGCT                                     | IU4368 <sup>9</sup> | 5'-flanking<br>fragment                                 |
| TT369                                                                                               | AAATTTTGGGCCCGGTTATTTATCATCATCAT<br>CTTTATAATCACGATTTTTG           |                     |                                                         |
| TT370                                                                                               | CACCTCCATTTTTCAAAAATCGTGATTATAAA<br>GATGATGATGATAAATAACCGGG        | IU4368 <sup>9</sup> | 3'-flanking<br>fragment                                 |
| TT166                                                                                               | TCATTGGGAGAGCCGGTTCCTGTGAAGAAT                                     |                     |                                                         |
| <b>For construction of IU6570 (<i>ftsZ</i>-Myc-<i>P<sub>c</sub></i>-<i>erm</i>)</b>                 |                                                                    |                     |                                                         |
| TT165                                                                                               | AGTGGTGCCGATATGGTCTTCATCACTGCT                                     | IU4368 <sup>9</sup> | 5'-flanking<br>fragment                                 |
| TT371                                                                                               | TAAAGATCTTCTTCAGAAATAAGTTTTTGTTC<br>CGATTTTTGAAAAATGGAGGTGTATCC    |                     |                                                         |
| TT372                                                                                               | AATCGTGAACAAAACTTATTTCTGAAGAAGA<br>TCTTTAACCGGGCCCAAATTTGTTTGA     | IU4368 <sup>9</sup> | 3'-flanking<br>fragment                                 |
| TT166                                                                                               | TCATTGGGAGAGCCGGTTCCTGTGAAGAAT                                     |                     |                                                         |
| <b>For construction of IU6819 (<i>pbp2x</i>-FLAG<sup>3</sup>-<i>P<sub>c</sub></i>-<i>erm</i>)</b>   |                                                                    |                     |                                                         |
| TT345                                                                                               | GTGACCCAGACGCAAATGATTTCGTGCCTTT                                    | D39                 | 5'-flanking<br>fragment                                 |



|                                                                                  |                                                                   |                                                                           |                          |
|----------------------------------------------------------------------------------|-------------------------------------------------------------------|---------------------------------------------------------------------------|--------------------------|
| SV026                                                                            | TTTATCATCATCATCTTTATAATCGTCTCCTAA<br>AGTTAATGTAATTTTTTTAATGTCC    |                                                                           |                          |
| SV027                                                                            | AAAATTACATTAACCTTTAGGAGACGATTATAA<br>AGATGATGATGATAAA             | IU6506 <sup>f</sup>                                                       | 3'-flanking<br>fragment  |
| TT346                                                                            | AGAAGTCAACCTTCCACTCGCTCCAAGGAT                                    |                                                                           |                          |
| <b>For construction of IU6929 (<i>pbp2x</i>-HA-P<sub>c</sub>-kan)</b>            |                                                                   |                                                                           |                          |
| TT345                                                                            | GTGACCCAGACGCAAATGATTCGTGCCTTT                                    | D39                                                                       | 5'-flanking<br>fragment  |
| SV034                                                                            | GCATAATCTGGAACATCATATGGATAGTCTCC<br>TAAAGTTAATGTAATTTTTTTAATGTCC  |                                                                           |                          |
| SV035                                                                            | ATTAATAAATTACATTAACCTTTAGGAGACTAT<br>CCATATGATGTTCCAGATTATGCTTAA  | IU6810 <sup>h</sup>                                                       | HA-P <sub>c</sub> -kan   |
| SV036                                                                            | CAGCACTGATGGAAATAAACATACTAAAACAA<br>TTCATCCAGTAAAATATAATTTTTATT   |                                                                           |                          |
| SV037                                                                            | AATATTATTTTTACTGGATGAATTGTTTTAGT<br>ATGTTTATTTCCATCAGTGCTGGAATT   | D39                                                                       | 3'-flanking<br>fragment  |
| TT346                                                                            | AGAAGTCAACCTTCCACTCGCTCCAAGGAT                                    |                                                                           |                          |
| <b>For construction of IU6962 and IU6964 (<i>ftsZ</i>-Myc-P<sub>c</sub>-kan)</b> |                                                                   |                                                                           |                          |
| TT165                                                                            | AGTGGTGCCGATATGGTCTTCATCACTGCT                                    | IU6570 <sup>f</sup>                                                       | 5'-flanking-<br>fragment |
| SV046                                                                            | CGGTGATATTCTCATTTTTAGCCATGTAATCAC<br>TCCTTCTTAATTACAAATTTTTAGCAT  |                                                                           |                          |
| SV047                                                                            | AAAATTTGTAATTAAGAAGGAGTGATTACAT<br>GGCTAAAATGAGAATATCACCGGA       | P <sub>c</sub> -kan-<br><i>rpsL</i> <sup>+</sup><br>cassette <sup>b</sup> | Kan ORF                  |
| SV048                                                                            | CTGTATTTTCTTTTACATTCATTTACCTAAAC<br>AATTCATCCAGTAAAATATAATTTTT    |                                                                           |                          |
| SV049                                                                            | TATATTTTACTGGATGAATTGTTTTAGGTAAAT<br>GAATGTAAAAGAAAATACAGAACTTGT  | D39                                                                       | 3'-flanking<br>fragment  |
| TT166                                                                            | TCATTGGGAGAGCCGGTTCCTGTGAAGAAT                                    |                                                                           |                          |
| <b>For construction of IU7199 (IU1945 <i>gpsB</i>-Myc-P<sub>c</sub>-erm)</b>     |                                                                   |                                                                           |                          |
| TT196                                                                            | GCCAAGCCCTGAGACAAATAGTAGTCGTTGGT                                  | D39                                                                       | 5'-flanking-<br>fragment |
| TT422                                                                            | TCTTCTTCAGAAATAAGTTTTTGTTCAAAATCT<br>GAGTTATCTAAAATTTGTTTACCAAAA  |                                                                           |                          |
| TT423                                                                            | AACAAATTTTAGATAACTCAGATTTTGAACAAA<br>AACTTATTTCTGAAGAAGATCTTTAAC  | IU6570 <sup>f</sup>                                                       | Myc-P <sub>c</sub> -erm  |
| TT199                                                                            | AAATTGCACATCTCAAATAACTACTTTCCTCCC<br>GTTAAATAATAGATAACTATTAATAAAT |                                                                           |                          |
| TT200                                                                            | TAGTTATCTATTATTTAACGGGAGGAAAGTAGT<br>TATTTGAGATGTGCAATTTTTGGATAA  | D39                                                                       | 3'-flanking-<br>fragment |

---

|       |                               |  |  |
|-------|-------------------------------|--|--|
| AL301 | CGTTTAAAGAGGCTAGACCCGGTCGTATC |  |  |
|-------|-------------------------------|--|--|

---

14           <sup>a</sup>Genomic DNA of the indicated *S. pneumoniae* strains was used as templates for  
15 PCR reactions, except for P<sub>c</sub>-*erm* cassettes.

16           <sup>b</sup>P<sub>c</sub>-*erm* and P<sub>c</sub>-*kan-rpsL*<sup>+</sup> cassettes are described in (Tsui *et al.*, 2011).

17           <sup>c</sup>Genotype of IU3348 is R6  $\Delta bgaA'::P_c\text{-}kant1t2\text{-}P_{fcsK}\text{-}pcsB\text{-}L\text{-}FLAG^3$  (Wayne *et al.*,  
18 2010).

19           <sup>d</sup>Genotype of IU3931 is D39  $\Delta cps \Delta mreCD\langle \rangle aad9//\Delta bgaA::kan\text{-}t1t2\text{-}P_{fcsK}\text{-}mreCD$   
20 (Land & Winkler, 2011).

21           <sup>e</sup>Genotype of IU3238 is R6 *mreC*-L-FLAG<sup>3</sup>-P<sub>c</sub>-*erm* (Land & Winkler, 2011).

22           <sup>f</sup>Strain from this study.

23           <sup>g</sup>Genotype of IU4368 is D39  $\Delta cps ftsZ\text{-}FLAG^3\text{-}P_c\text{-}erm$  (Tsui *et al.*, 2011).

24           <sup>h</sup>IU6810 is an unpublished laboratory strain.

## SUPPLEMENTAL MOVIE LEGENDS

**Movie S1.** Dual FtsZ and GpsB IFM of strain IU6964 (*ftsZ-Myc gpsB-FLAG*) imaged using 3D-SIM showing Y-axis rotation of the two cells in Fig. 3B (a). FtsZ and GpsB staining are represented by red and green signals, respectively.

**Movie S2.** Dual FtsZ and Pbp2x IFM of cells of strain IU6978 (*ftsZ-Myc pbp2x-FLAG<sup>3</sup>*) imaged using 3D-SIM showing X-axis rotation of the middle section of the cell in Fig.4B (a). FtsZ and Pbp2x staining are represented by red and green signals, respectively.

**Movie S3.** Dual FtsZ and Pbp1a IFM of cells of strain IU6976 (*ftsZ-Myc pbp1a-FLAG*) imaged using 3D-SIM showing Y-axis rotation of the cell in Fig. 5B (a). FtsZ, Pbp1a, and DAPI staining are represented by red, green, and blue signals, respectively.

**Movie S4.** Dual Pbp2x and Pbp1a IFM of cells of strain IU7365 (*pbp2x-HA pbp1a-L-FLAG<sup>3</sup>*) imaged using 3D-SIM showing X-axis rotation of the late-divisional cell in Fig. 6B (d). Pbp2x, Pbp1a, and DAPI staining are represented by red, green, and blue signals, respectively.

**Movie S5.** Multiple FtsZ rings shown by IFM of strain IU6944 ( $\Delta$ *gpsB/P<sub>fcsK</sub>-gpsB* *ftsZ-FLAG*) depleted of GpsB in BHI broth lacking fucose. Images were obtained by 3D-SIM and show Y-axis rotation of the cell in Fig. 7A (bottom). FtsZ and DAPI staining are represented by green and blue signals, respectively.

**Movie S6.** Multiple Pbp1a rings shown by IFM of cells of strain IU5980 ( $\Delta$ *gpsB/P<sub>fcsK</sub>-gpsB<sup>+</sup> pbp1a-FLAG*) depleted for GpsB in BHI broth lacking fucose. Images were obtained by 3D-SIM and show Y-axis rotation of the cell in Fig. 7B

47 (bottom). Pbp1a and DAPI staining are represented by green and blue signals,  
48 respectively.

49

## 50 REFERENCES

51 Evan, G.I., G.K. Lewis, G. Ramsay & J.M. Bishop, (1985) Isolation of monoclonal  
52 antibodies specific for human c-myc proto-oncogene product. *Molec and Cell Biol*  
53 **5**: 3610-3616.

54

55 Hopp, T. P., K. S. Prickett, V. L. Price, R. T. Libby, C. J. March, D. P. Cerretti, D. L.  
56 Urdal, and P. J. Conlon, (1988). A short polypeptide marker sequence useful for  
57 recombinant protein identification and purification. *Biotechnology (NY)* **6**:1204-  
58 1210.

59

60 Land, A.D. & M.E. Winkler, (2011) The requirement for pneumococcal MreC and MreD  
61 is relieved by inactivation of the gene encoding PBP1a. *J Bacteriol* **193**: 4166-  
62 4179.

63

64 Lanie, J.A., W.L. Ng, K.M. Kazmierczak, T.M. Andrzejewski, T.M. Davidsen, K.J.  
65 Wayne, H. Tettelin, J.I. Glass & M.E. Winkler, (2007) Genome sequence of  
66 Avery's virulent serotype 2 strain D39 of *Streptococcus pneumoniae* and  
67 comparison with that of unencapsulated laboratory strain R6. *J Bacteriol* **189**: 38-  
68 51.

69

70 Tsui, H.C., S.K. Keen, L.T. Sham, K.J. Wayne & M.E. Winkler, (2011) Dynamic  
71 distribution of the SecA and SecY translocase subunits and septal localization of  
72 the HtrA surface chaperone/protease during *Streptococcus pneumoniae* D39 cell  
73 division. *mBio* **2**(5). pii: e00202-11. doi: 10.1128/mBio.00202-11.

74

75 Tu, Y., F. Li, , & C. Wu, (2008) Nck-2, a novel Src homology2/3-containing adaptor  
76 protein that interacts with the LIM-only protein PINCH and components of growth  
77 factor receptor kinase-signaling pathways. *Mol. Bio. Cell* **9**: 3367-3382.

78

79 Waldo, G. S., B. M. Standish, J. Berendzen, and T. C. Terwilliger, (1999). Rapid protein-  
80 folding assay using green fluorescent protein. *Nat. Biotechnol* **17**:691-695

81

82 Wayne, K.J., L.T. Sham, H.C. Tsui, A.D. Gutu, S.M. Barendt, S.K. Keen & M.E. Winkler,  
83 (2010) Localization and cellular amounts of the WalRKJ (VicRKX) two-  
84 component regulatory system proteins in serotype 2 *Streptococcus pneumoniae*.  
85 *J Bacteriol* **192**: 4388-4394.

86

## SUPPLEMENTAL FIGURE LEGENDS

**Fig. S1.** Time course of cell morphological changes during GpsB depletion in *S. pneumoniae* D39. Strain IU4888 ( $\Delta gpsB/P_{fcsK-gpsB^+}$ ) (Table S1) was grown exponentially in BHI broth containing 1.0% (wt/vol) fucose to  $OD_{620} \approx 0.1$ , washed, and resuspended to  $OD_{620} \approx 0.03$  in BHI broth containing 1.0% (wt/vol) or no fucose as described in *Experimental procedures*. (A) Growth curves of strain IU4888 following resuspension in BHI broth containing or lacking fucose. Arrows indicate when samples were taken from cultures lacking fucose and correspond to the images in B. (B) Representative images of cells of strain IU4888 after 20 min, 1h 10 min, 2h, 3h, and 4h without fucose (scale bar = 1  $\mu$ m). (C) Box-and-whisker plots (whiskers, 5 and 95 percentile) of cell lengths (top) and widths (bottom) of parent strain IU1945 (D39  $\Delta cps gpsB^+$ ) and strain IU4888 depleted of GpsB. Cells were measured as described in *Experimental procedures*. Column 1, separated, pre-divisional cells IU1945 grown exponentially in BHI broth; column 2, pre-divisional cells of IU4888 grown exponentially in BHI containing fucose; column 3, pre-divisional cells of IU4888 grown exponentially in BHI containing fucose, washed with BHI, and grown in BHI containing fucose for 1.5 h (washing control); columns 4 to 6, separated cells of IU4888 grown exponentially in BHI containing fucose, washed with BHI, and resuspended in BHI without fucose for 1, 2 or 3 h. 70 or more cells from at least 3 microscope fields were measured for each condition. P values were obtained by one-way ANOVA analysis (GraphPad Prism, nonparametric Kruskal-Wallis test). The median cell lengths and widths of the IU4888 –f 1h, –f 2h, and –f 3h samples were significantly different ( $p < 0.05$ ) from those of the

109 IU4888 + fucose sample. Independent experiments confirmed that cells of IU4888  
110 limited for fucose for 2 and 3h or 2.5 h had median lengths and widths similar to those in  
111 the graphs, which were significantly ( $p < 0.05$ ) larger than IU4888 grown with fucose  
112 (data not shown).

113 **Fig. S2.** GpsB is essential for growth of *S. pneumoniae* D39. IU4888 ( $\Delta gpsB/P_{fcsK^-}$   
114  $gpsB^+$ ) was grown overnight in BHI broth containing 0.8% (wt/vol) fucose, washed, and  
115 resuspended to  $OD_{620} \approx 0.005$  in BHI broth containing 0.1% or 0.8% (wt/vol) or no  
116 fucose as described in *Experimental procedures*. This was a different limitation protocol  
117 than the one used for Fig. 1 and S1 (see the text). The IU1945 parent (D39  $\Delta cps gpsB^+$ )  
118 was grown without fucose for comparison. (A) Growth curves of strain IU1945 or IU4888  
119 depleted for GpsB. Arrows indicate when samples were taken for staining and  
120 microscopy. Prolonged incubation of IU4888 in medium lacking fucose led to the  
121 accumulation of suppressors in some cultures (data not shown). (B) Representative  
122 images of IU1945 grown to mid-log phase ( $OD_{620} \approx 0.15$ ), stained with FL-V, and  
123 observed by phase-contrast (Phase) and epifluorescent microscopy (FL-V) (see  
124 *Experimental procedures*). (C) Representative images of elongated, enlarged cells  
125 containing multiple rings of FL-V staining caused by depletion of GpsB (scale bar = 1  
126  $\mu m$ ). Images of IU4888 cells in 0.1% (wt/vol) fucose or no fucose are representative of  
127  $\approx 50\%$  of the observed cells. The elongated IU4888 cell in 0.8% (wt/vol) fucose (lower  
128 row) was far less prevalent ( $\approx 5\%$ ) than normal looking cells (top row). The experiment  
129 was performed twice with similar results.

130 **Fig. S3.** Deletion of pneumococcal Class A PBPs does not relieve lethality of GpsB  
131 depletion. Strains IU4888 ( $\Delta gpsB/P_{fcsK}^- gpsB^+$ ), IU4978 (IU4888  $\Delta pbp1a$ ), IU4974  
132 (IU4888  $\Delta pbp1b$ ), and IU4972 (IU4888  $\Delta pbp2a$ ) were grown overnight in BHI broth  
133 containing 0.8% (wt/vol) fucose, washed, and resuspended to  $OD_{620} \approx 0.005$  in BHI  
134 broth containing 0.8% (wt/vol) or no fucose as described in *Experimental procedures*.  
135 See the text for additional details.

136 **Fig. S4.** Representative graphs showing inhibition of Boc-FL labeling of different  
137 PBPs after 30 min treatments with different doses of cefotaxime (A and B) or piperacillin  
138 (C and D) in PBS at 25°C (A and C) or in BHI broth at 37 °C (B and D). Strain IU1945  
139 (D39  $\Delta cps$ ) was grown to mid-exponential phase in BHI broth, treated with cefotaxime  
140 or piperacillin for 30 min at the indicated concentrations, and labeled with Boc-FL as  
141 described for Fig. 2 and in *Experimental procedures*.

142 **Fig. S5.** Representative images of strain IU1945 (D39  $\Delta cps$ ) grown to exponential  
143 phase before (A), 40 min after (B), and 60 min after (C) addition of 0.1  $\mu\text{g/ml}$  methicillin.  
144 Cells were stained with FL-V and DAPI as described in *Experimental procedures* and  
145 observed by phase-contrast (Phase) or epifluorescent microscopy. Scale bar = 1  $\mu\text{m}$ .  
146 (D) Box-and-whisker plots (whiskers, 5 and 95 percentile) of cell lengths (left) and  
147 widths (right) of IU1945 before and at indicated times after treatment with methicillin at  
148 0.1  $\mu\text{g/ml}$ . Cell dimensions were determined as described in *Experimental procedures*.  
149 The total number of cells measured were 20 for  $t = 0$ , 16 for  $t = 15$  min, and  $>25$  for the  
150 other time points from at least three microscopic fields. P values were obtained by one-  
151 way ANOVA analysis (GraphPad Prism, nonparametric Kruskal-Wallis test). The

152 median values of cell lengths and widths for the 38, 51, 71 and 93 min samples were  
153 significantly larger ( $p < 0.05$ ) than the median lengths and widths of cells in the 0 min  
154 sample, which had similar dimensions to IU1945 cells in Fig. S1C, based on a large  
155 sample size. Independent experiments confirmed that IU1945 cells treated with 0.1  
156  $\mu\text{g/ml}$  methicillin for 50 or 60 min had median lengths and widths similar to those in the  
157 graphs, which were significantly larger ( $p < 0.05$ ) than for untreated cells (data not  
158 shown).

159 **Fig. S6.** Phenotypes of cells expressing epitope-tagged PBPs and division proteins  
160 used in this study. Full genotypes of strains are listed in Table S1. Growth  
161 determinations, Western blotting of protein amounts, and quantification of Boc-FL  
162 labeling of PBPs were performed as described in *Experimental procedures*. (A)  
163 Representative growth curves of the IU1945 parent ( $D39 \Delta cps\ gpsB^+$ ), IU5838 ( $gpsB$ -  
164 FLAG), and IU5458 ( $gpsB$ -L-FLAG<sup>3</sup>) strains. (B) Western-blot analysis of strains IU1945  
165 (untagged parent, lane 1), IU5838 ( $gpsB$ -FLAG, lane 2), and IU5458 ( $gpsB$ -L-FLAG<sup>3</sup>,  
166 lane 3). (C) Representative growth curves of IU1945 parent, IU5544 ( $pbp1a$ -L-FLAG<sup>3</sup>),  
167 and IU5840 ( $pbp1a$ -FLAG). (D) Western-blot analysis of strains IU1945 (untagged  
168 parent, lane 1), IU5544 ( $pbp1a$ -L-FLAG<sup>3</sup>, lane 2) and IU5840 ( $pbp1a$ -FLAG, lane 3). (E)  
169 Representative growth curves of IU1945 parent, IU6565 ( $ftsZ$ -FLAG), IU6819 ( $pbp2x$ -  
170 FLAG<sup>3</sup>), IU6962 ( $ftsZ$ -Myc- $P_c$ -*kan*), and IU6570 ( $ftsZ$ -Myc- $P_c$ -*erm*). (F) Western-blot  
171 analysis of strains IU1945 (untagged parent, lane 1), IU6565 ( $ftsZ$ -FLAG, lane 2), and  
172 IU6819 ( $pbp2x$ -FLAG<sup>3</sup>, lane 3). (G) Western-blot analysis of strains IU1945 (untagged  
173 parent, lane 1), IU6570 ( $ftsZ$ -Myc- $P_c$ -*erm*, lane 2), and IU6962 ( $ftsZ$ -Myc- $P_c$ -*kan*, lane



174 3). (H) Boc-FL binding to PBPs in strains IU1945 (parent), IU6819 (*pbp2x*-FLAG<sup>3</sup>), and  
175 IU5840 (*pbp1a*-FLAG). Amounts of PBPs were normalized to Pbp3 as a loading control.  
176 The amounts of Pbp2x-FLAG<sup>3</sup> and Pbp1a-FLAG in the shifted bands were ≈91% and  
177 ≈92% of the amounts of untagged Pbp2x and Pbp1a in the parent strain, respectively.  
178 (I) Representative growth curves of strains IU1945 (parent) and IU6929 (*pbp2x*-HA). (J)  
179 Western-blot analysis of strains IU1945 (untagged parent, lane 1) and IU6929 (*pbp2x*-  
180 HA, lane 2). (K) Boc-FL binding to PBPs in strains IU1945 (parent), IU5544 (*pbp1a*-L-  
181 FLAG<sup>3</sup>), IU6929 (*pbp2x*-HA), and IU7365 (*pbp1a*-L-FLAG<sup>3</sup> - *pbp2x*-HA). Amounts of  
182 PBPs were normalized to Pbp3 as a loading control. The amounts of Pbp1a-L-FLAG<sup>3</sup>  
183 and Pbp2x-HA in the shifted bands were ≈98% and ≈60% of the amounts of untagged  
184 Pbp1a and Pbp2x in the parent strain, respectively. See text for additional details.

185 **Fig. S7.** Representative images of dual-protein 2D IFM of cells expressing tagged  
186 versions of (A) FtsZ and GpsB, (B) FtsZ and Pbp2x, and (C) FtsZ and Pbp1 at different  
187 stages of cell division. Strains IU6964 (*ftsZ*-Myc *gpsB*-FLAG) (A); IU6978 (*ftsZ*-Myc  
188 *pbp2x*-FLAG<sup>3</sup>) (B); and IU6976 (*ftsZ*-Myc *pbp1a*-FLAG) (C) were grown to mid-  
189 exponential phase in BHI broth, and DAPI staining and 2D IFM of cells were performed  
190 as described in *Experimental procedures*. Cells at different stages of division were  
191 binned based on images from phase-contrast microscopy (column 1), and localization  
192 patterns of FtsZ (pseudo-colored red, columns 2 and 5), GpsB (A), Pbp2x(B) or  
193 Pbp1a(C) (pseudo-colored green; columns 3 and 5), DNA (DAPI stained, colored white,  
194 column 4) and superimposed signals of FtsZ and GpsB, Pbp2x or Pbp1a (yellow,  
195 column 5) were determined from images obtained by wide-field epifluorescence

196 microscopy (see *Experimental procedures*). Scale bar = 1  $\mu$ m. Cells in images like these  
197 were binned according to division stage, and average cell shapes and fluorescent  
198 intensity distributions in cells at different division stages were determined by using the  
199 graphical user interface program described in *Experimental procedures* (see Fig. 3A-  
200 5A). (D) Plot of cell length versus division stage obtained from the analysis of strain  
201 IU6978 (*ftsZ-Myc pbp2x-FLAG*<sup>3</sup>) shown in Fig. 4A. The plot was generated by the  
202 graphical user interface program (see *Experimental procedures*). Similar distributions  
203 were obtained for cells in Fig. 3A, 5A, and 6A (data not shown).

204 **Fig. S8.** Presence of multiple FtsZ rings in elongated cells depleted of GpsB. (A) 2D-  
205 IFM of strain IU6565 (*gpsB*<sup>+</sup> *ftsZ-FLAG*) grown to mid-exponential phase and processed  
206 for IFM and DAPI staining as described in *Experimental procedures*. (B) 2D-IFM of  
207 strain IU6944 ( $\Delta$ *gpsB*//*P*<sub>*fcsk*</sub>-*gpsB*<sup>+</sup> *ftsZ-FLAG*) depleted of GpsB. Overnight cultures of  
208 strain IU6944 grown in BHI broth containing 1.0% (wt/vol) fucose were diluted to OD<sub>620</sub>  
209  $\approx$ 0.005 in fresh BHI broth containing 1.0% (wt/vol) fucose. At OD<sub>620</sub>  $\approx$ 0.1, cells were  
210 washed, and resuspended to OD  $\approx$ 0.03 in fresh BHI broth containing 1.0% (wt/vol) or no  
211 fucose. DAPI staining and IFM were performed on cells 2 and 3 h after resuspension  
212 (see *Experimental procedures*). FtsZ (pseudo-colored green; columns 2 and 4) and  
213 DNA (DAPI) (pseudo-colored white; column 3) were obtained from epifluorescent  
214 microscopy as described in *Experimental procedures*. All images are shown at the  
215 same magnification (scale bar = 1  $\mu$ m) and are representative of >500 cells examined  
216 from multiple fields. Multiple bands of FtsZ in two GpsB-depleted cells are marked by  
217 white arrowheads. Similar results were obtained for strains IU6570 (*gpsB*<sup>+</sup> *ftsZ-Myc*)

218 and IU6946 ( $\Delta gpsB/P_{fcsK^-} gpsB^+ ftsZ\text{-Myc}$ ), in which *ftsZ* was tagged with Myc instead of  
219 FLAG (data not shown).

220 **Fig. S9.** Presence of multiple rings of Pbp2x in elongated cells depleted of GpsB. (A)  
221 2D-IFM images of strain IU6819 ( $gpsB^+ pbp2x\text{-FLAG}^3$ ) grown to mid-exponential phase,  
222 and processed for DAPI staining and IFM as described in *Experimental procedures*. (B)  
223 2D-IFM images of strain IU6890 ( $\Delta gpsB/P_{fcsK^-} gpsB^+ pbp2x\text{-FLAG}^3$ ) depleted of GpsB  
224 as described for Fig. S8B. Samples were processed for microscopy 2 and 3 h after  
225 cultures were resuspended in BHI broth lacking fucose. DNA (DAPI) is pseudo-colored  
226 white in column 3 and Pbp2x is pseudo-colored green in columns 2 and 4. All images  
227 are shown at the same magnification (scale bar = 1  $\mu\text{m}$ ) and are representative of >500  
228 cells examined from multiple fields. The experiment was performed twice with similar  
229 results. Multiple bands of Pbp2x in two GpsB-depleted cells are marked by white  
230 arrowheads.

231 **Fig. S10.** Presence of multiple Pbp1a rings in elongated cells depleted of GpsB. (A)  
232 2D-IFM of strain IU5840 ( $gpsB^+ pbp1a\text{-FLAG}$ ) that was grown to mid-exponential phase  
233 and processed for IFM and DAPI staining as described in *Experimental procedures*. (B)  
234 2D-IFM of strain IU5980 ( $\Delta gpsB/P_{fcsK^-} gpsB^+ pbp1a\text{-FLAG}$ ) depleted for GpsB as  
235 described for Fig. S8B. DAPI staining and IFM were performed on cells 2 and 3 h after  
236 resuspension (see *Experimental procedures*). Pbp1a (pseudo-colored green; columns 2  
237 and 4) and DNA (DAPI) (pseudo-colored white; column 3) were obtained from  
238 epifluorescent microscopy as described in *Experimental procedures*. All images are  
239 shown at the same magnification (scale bar = 1  $\mu\text{m}$ ) and are representative of >500

240 cells examined from multiple fields. Multiple bands of Pbp1a in two GpsB-depleted cells  
241 are marked by white arrowheads.

242 **Fig. S11.** Presence of multiple rings of MreC in cells depleted of GpsB. 2D-IFM  
243 images are shown of strain IU4976 ( $\Delta gpsB//P_{fcsK^-} gpsB^+ mreC\text{-L-FLAG}^3$ ) resuspended in  
244 BHI broth containing or lacking fucose as described for Fig. S8B. DAPI staining and IFM  
245 were performed as described in *Experimental procedures* on cells resuspended for 2 h  
246 in BHI broth containing fucose (top row) or lacking fucose for 2 or 3 h (rows 2 and 3).  
247 DNA (DAPI) is pseudo-colored white in column 3, and MreC is pseudo-colored green in  
248 columns 2 and 4. All images are shown at the same magnification (scale bar = 1  $\mu\text{m}$ )  
249 and are representative of >500 cells examined from multiple fields. The experiment was  
250 performed twice with similar results. Multiple bands of MreC in one GpsB-depleted cell  
251 are marked by white arrowheads.

252

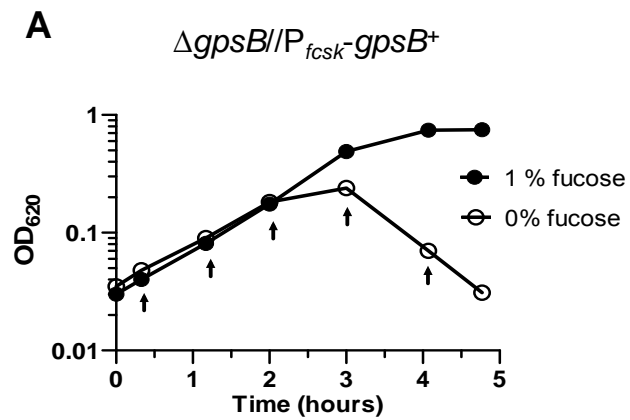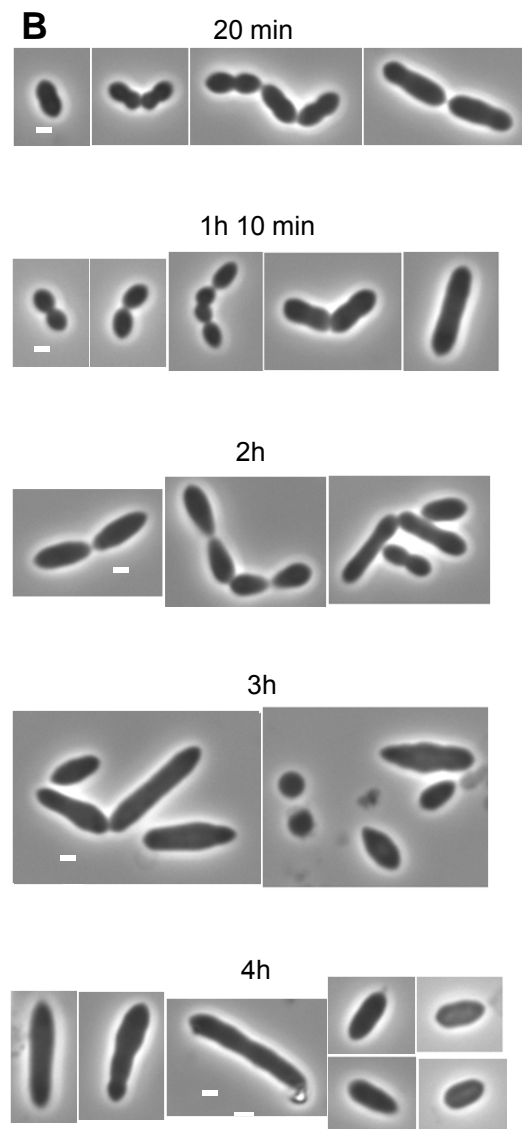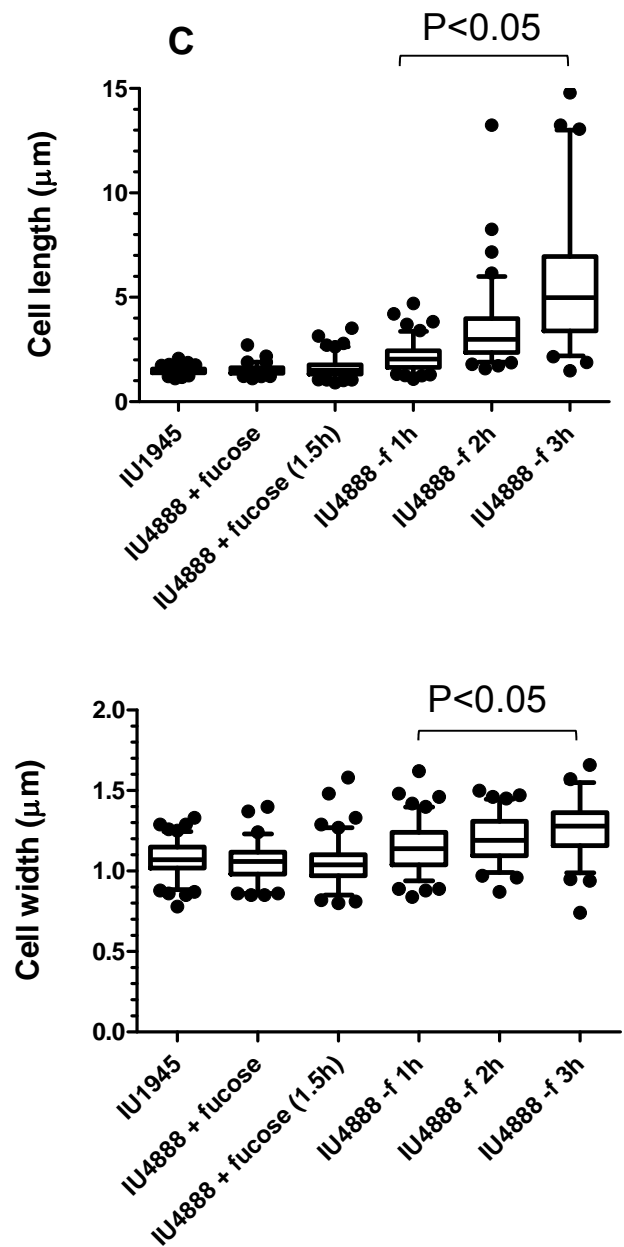

Fig. S1

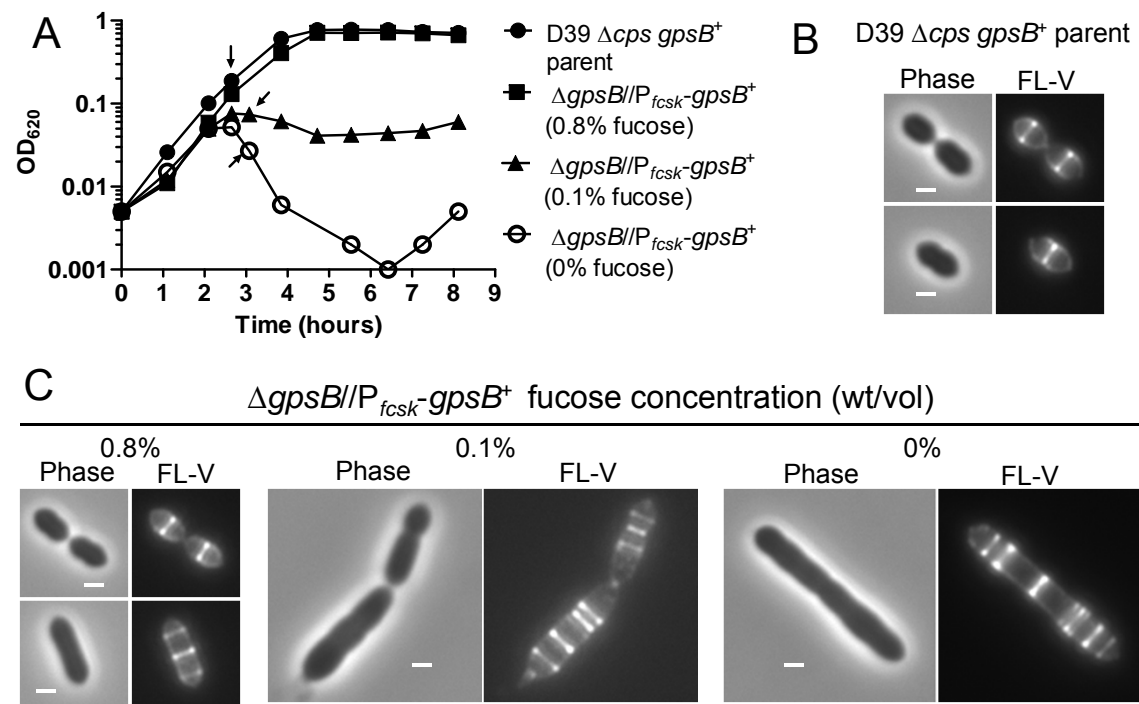

Fig. S2

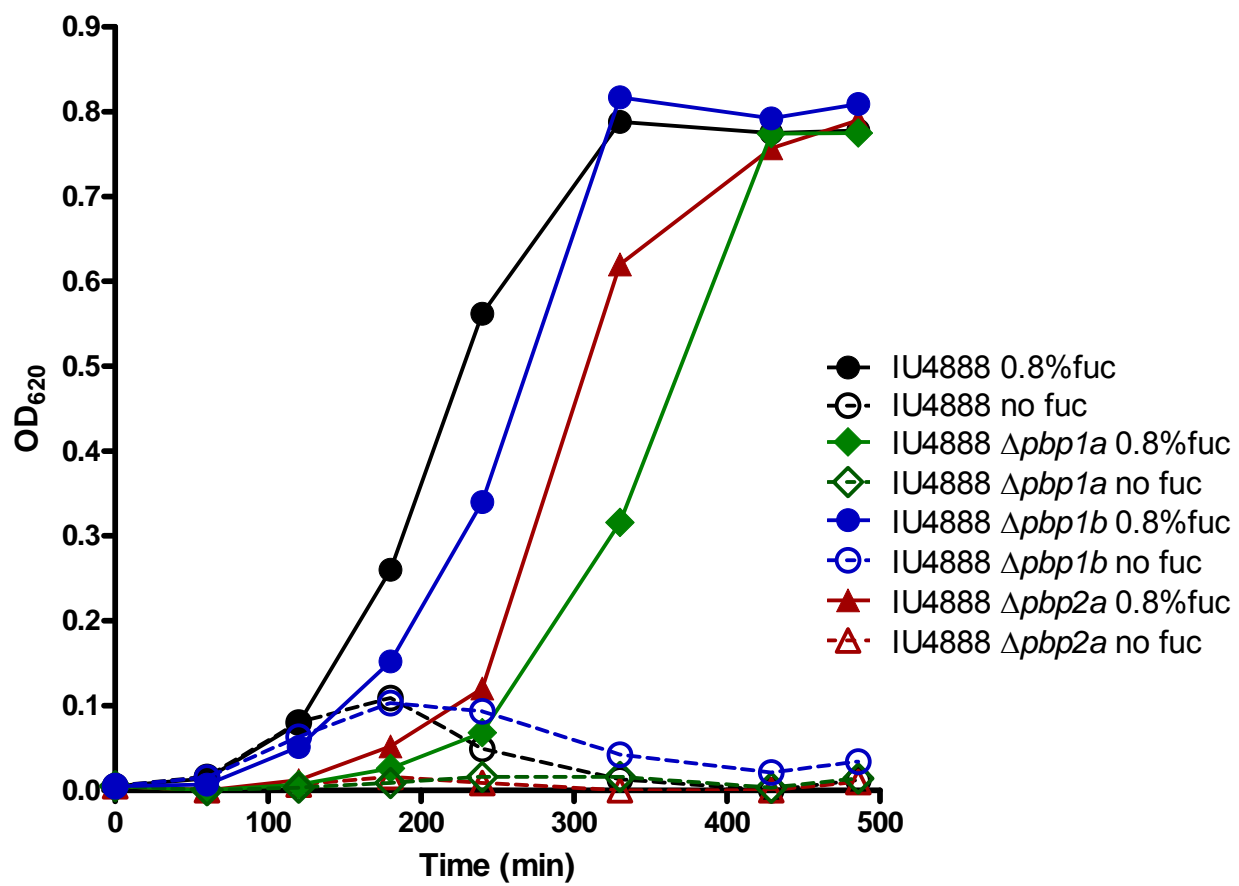

Fig. S3

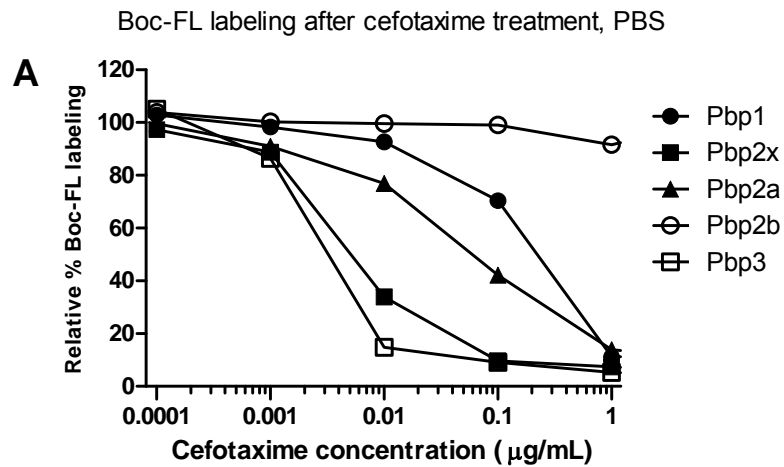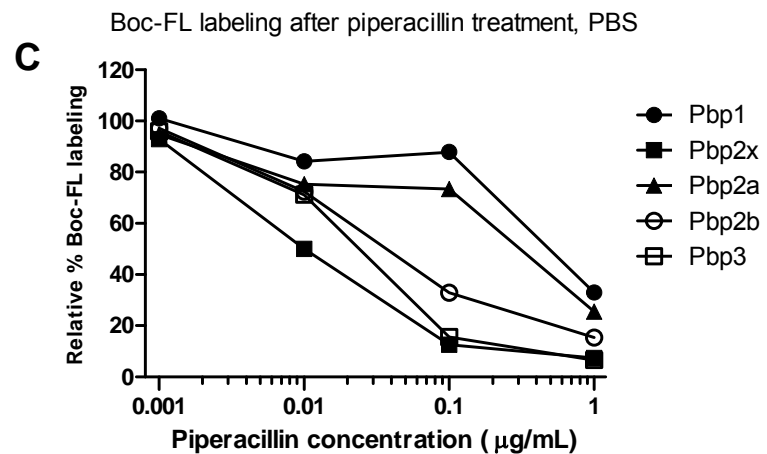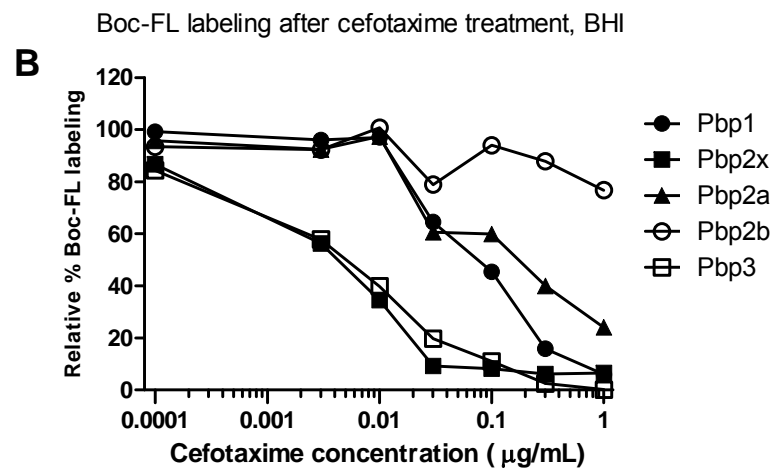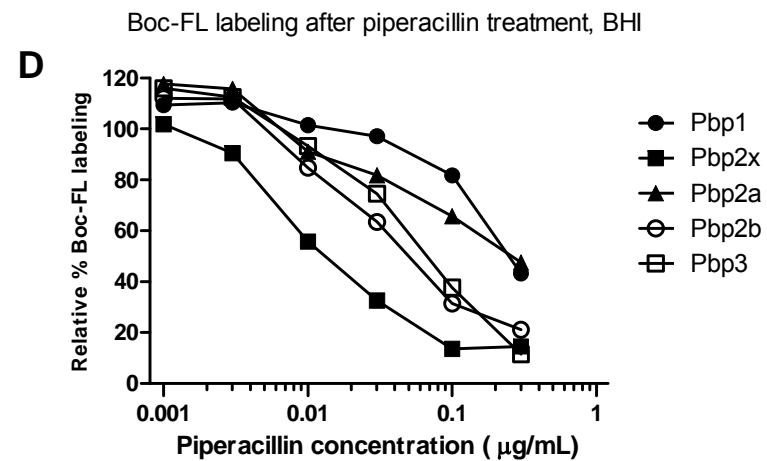

Fig. S4



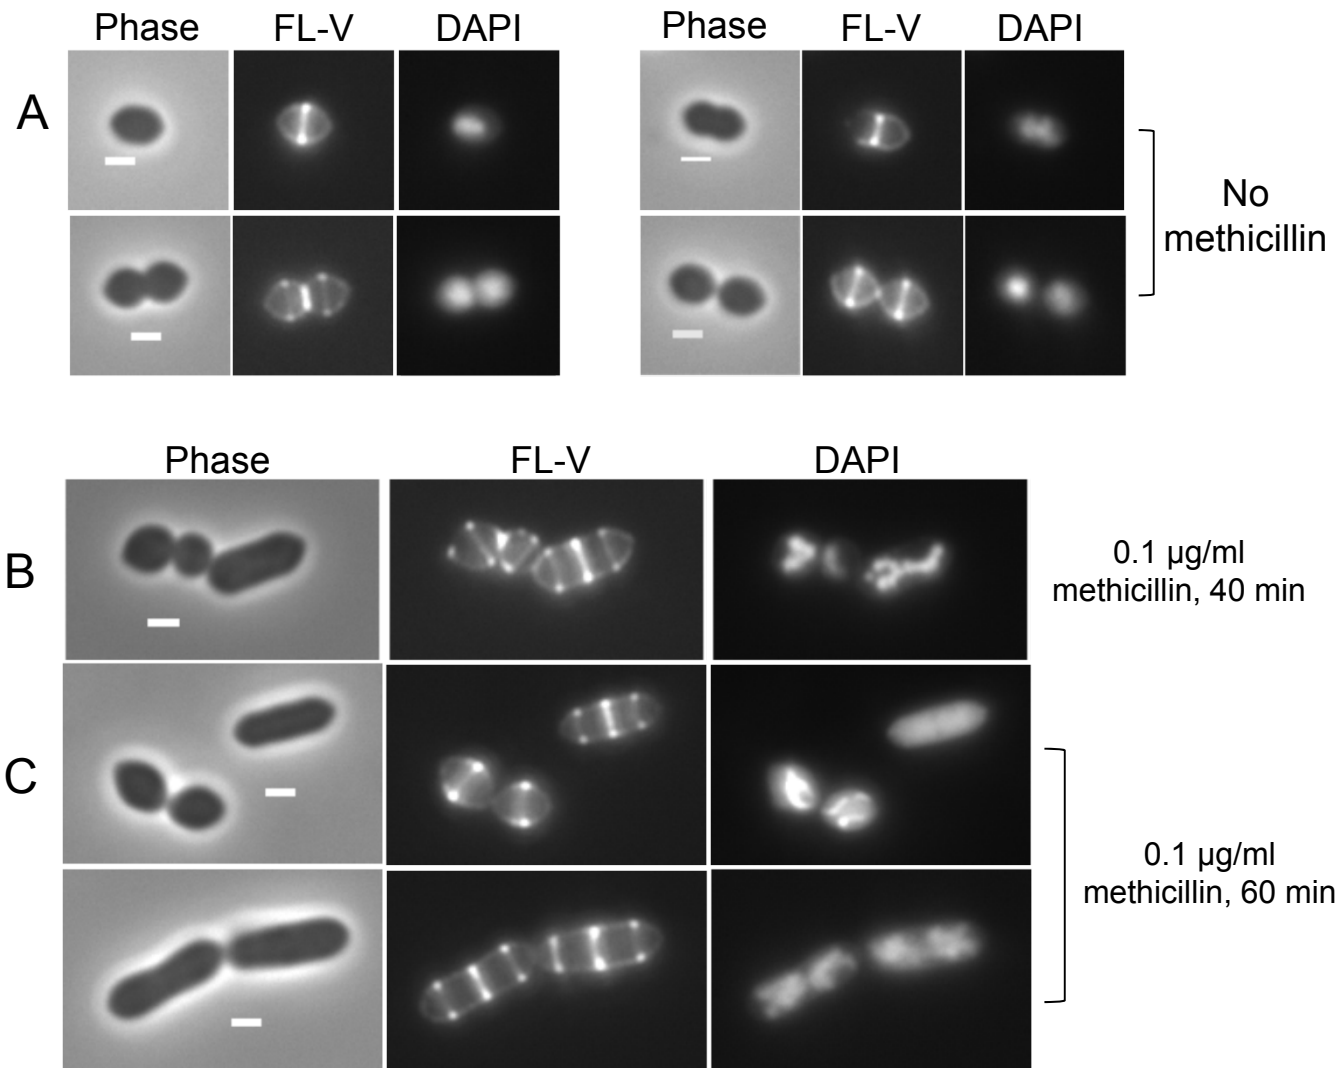

Fig. S5 (continued on next page)

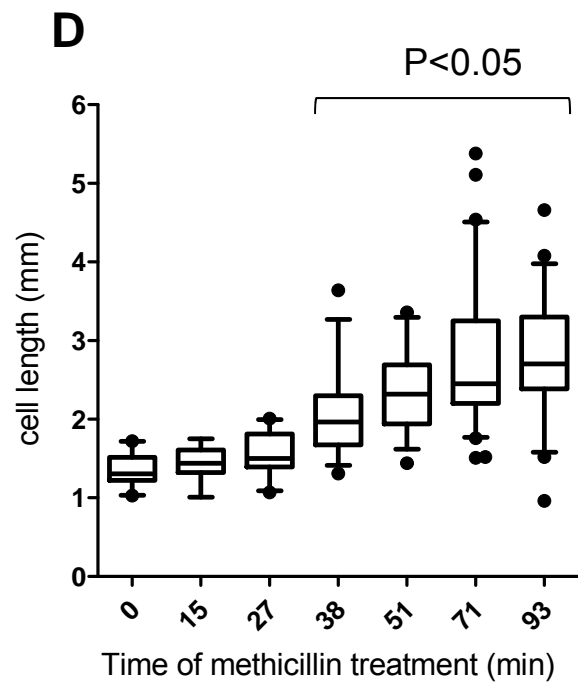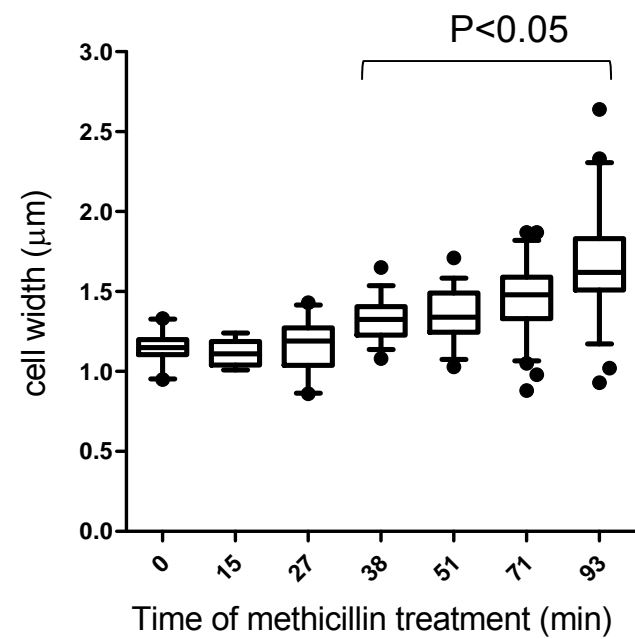

Fig. S5 (continued)

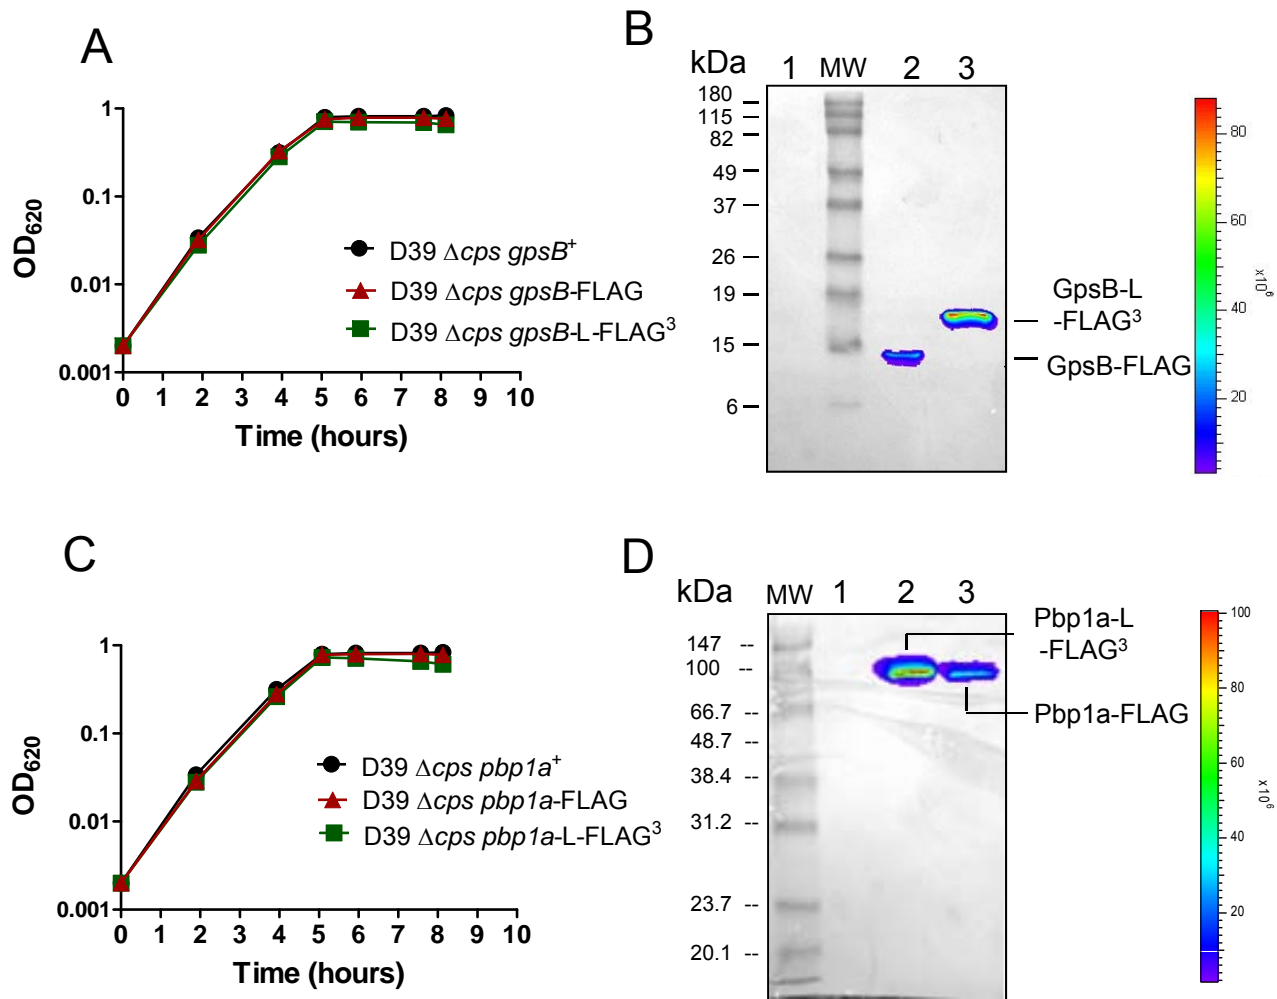

Fig. S6 (continued on next pages)

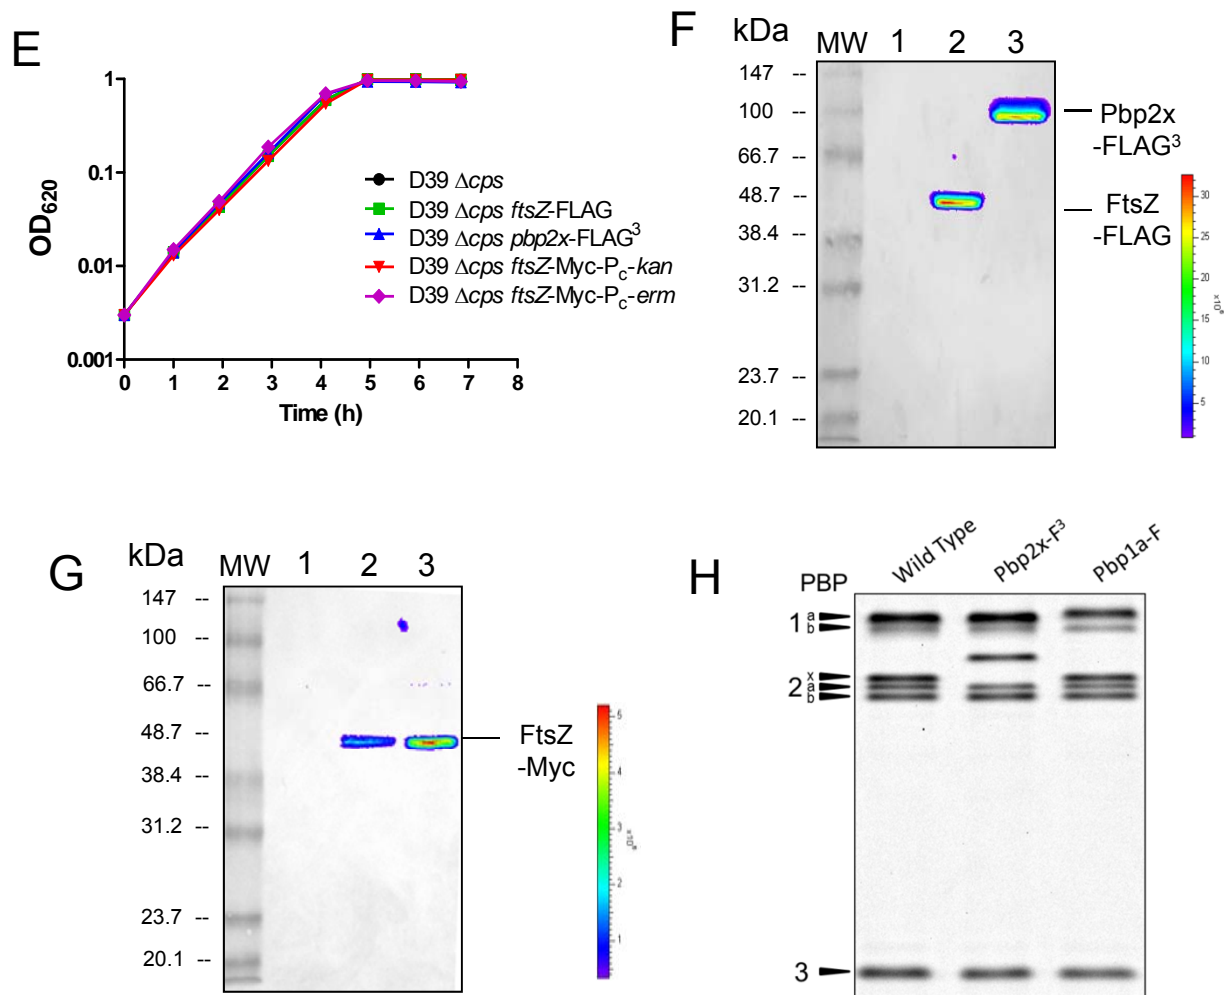

Fig. S6 (continued on next page)

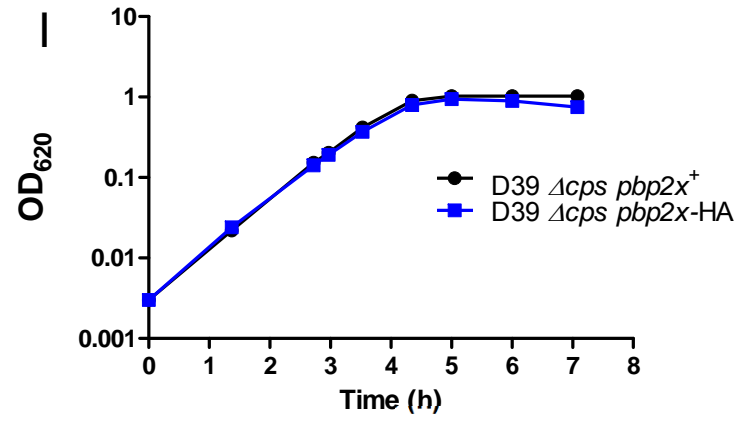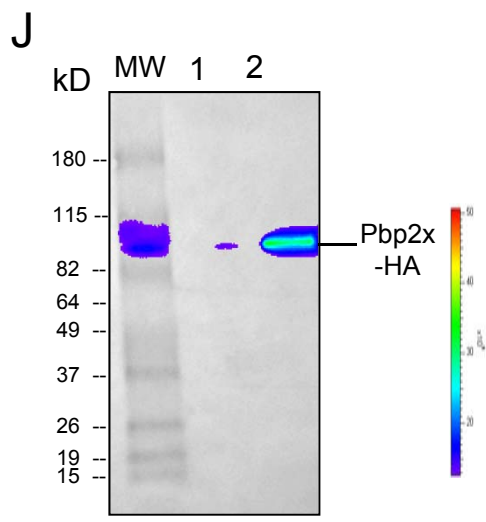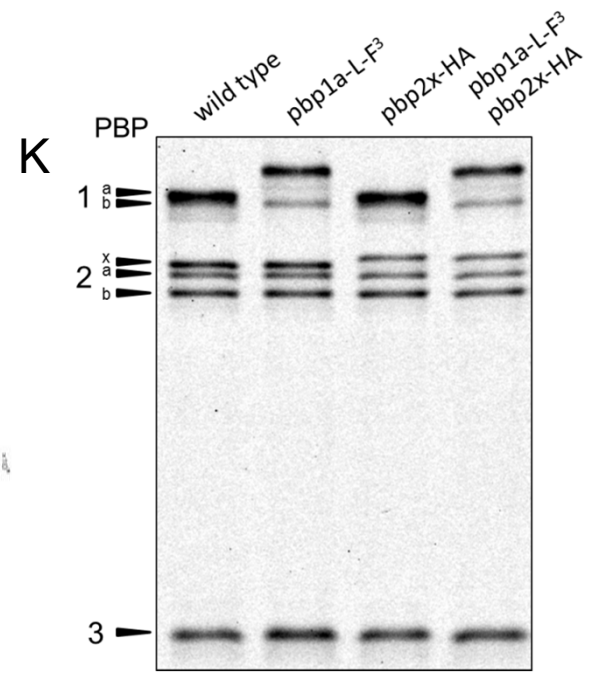

Fig. S6 (continued)

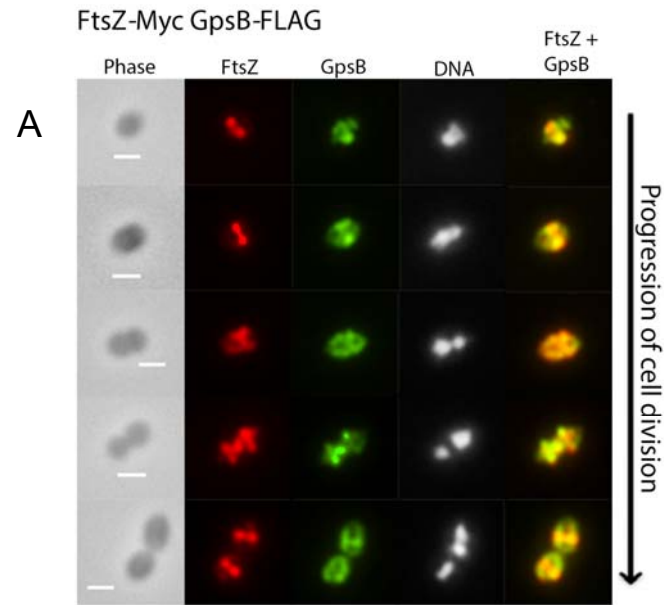

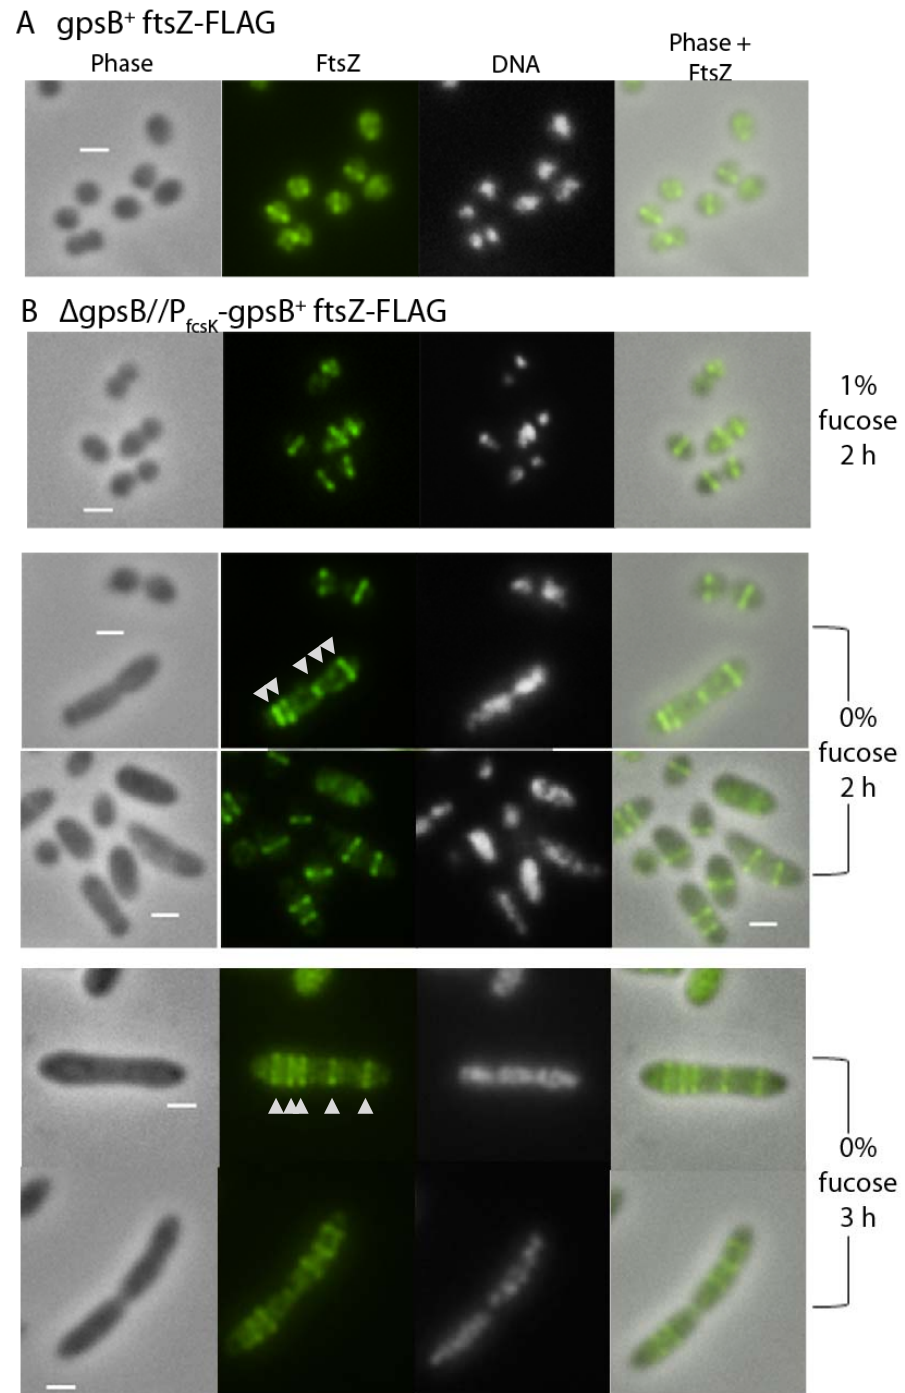

Fig. S8

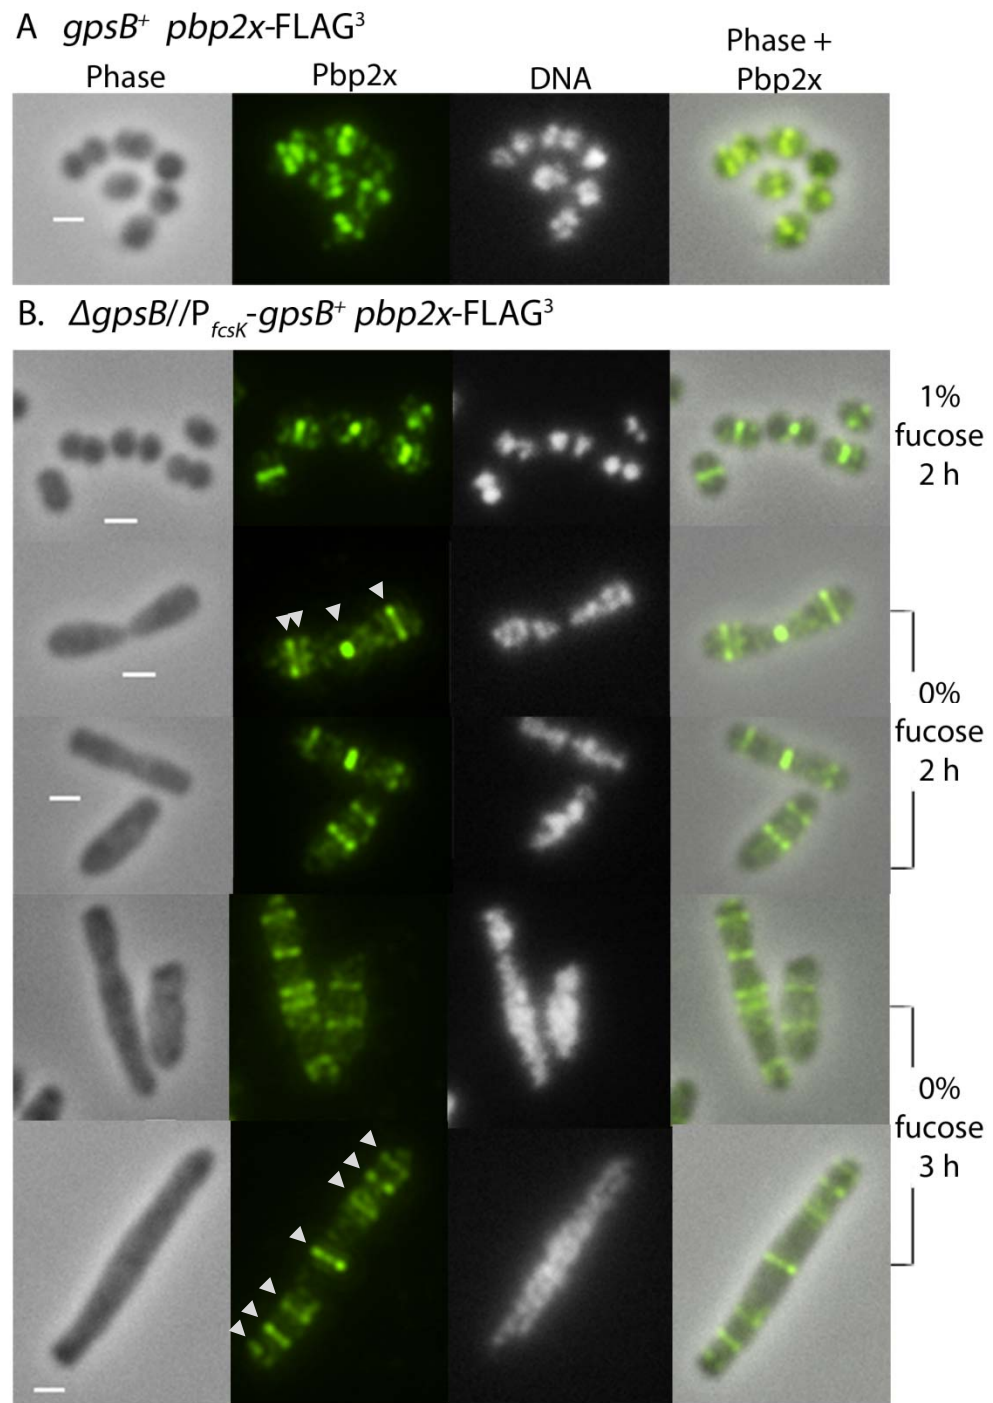

Fig. S9



A. *gpsB*<sup>+</sup> *pbp1a*-FLAG

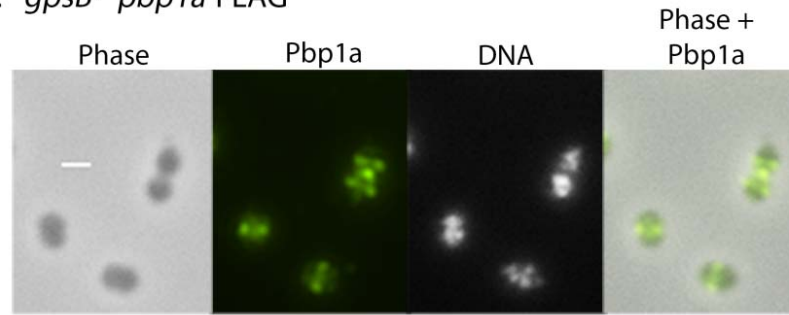

B.  $\Delta$ *gpsB*//*P*<sub>*fcsK*</sub>-*gpsB*<sup>+</sup> *pbp1a*-FLAG

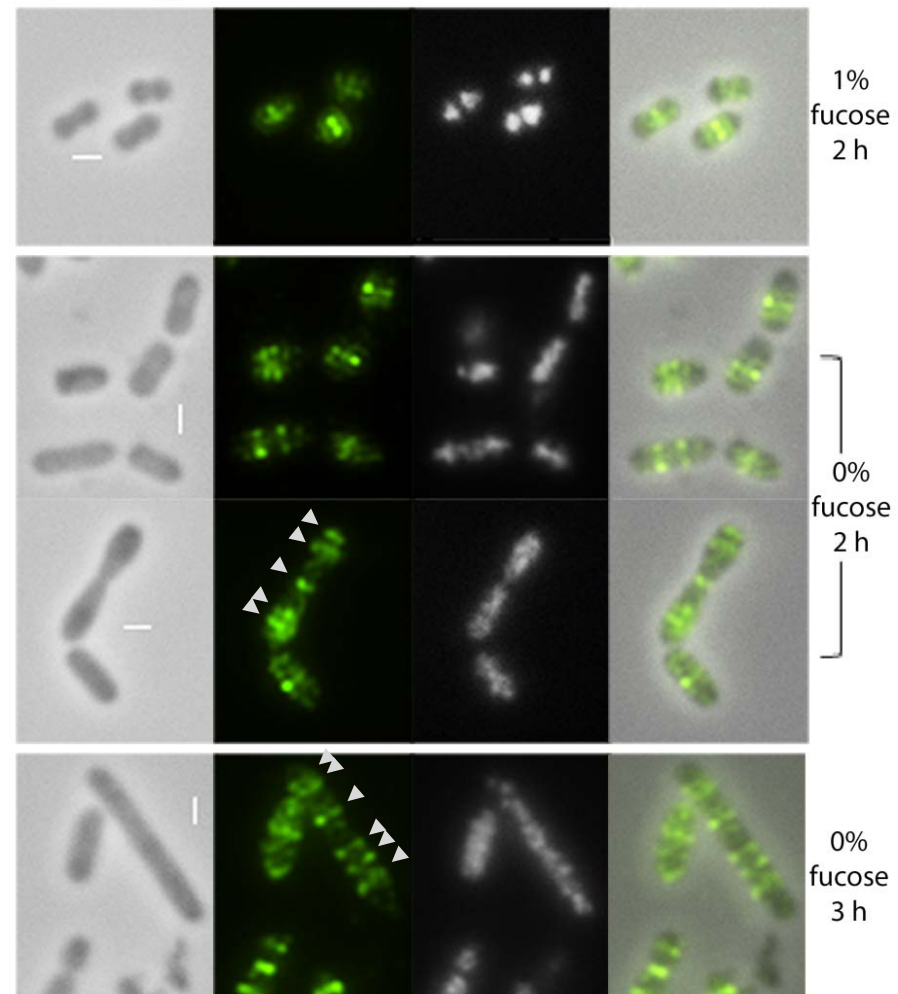

Fig. S10

$\Delta gpsB/P_{fcsK}-gpsB^+ mreC-L-FLAG^3$

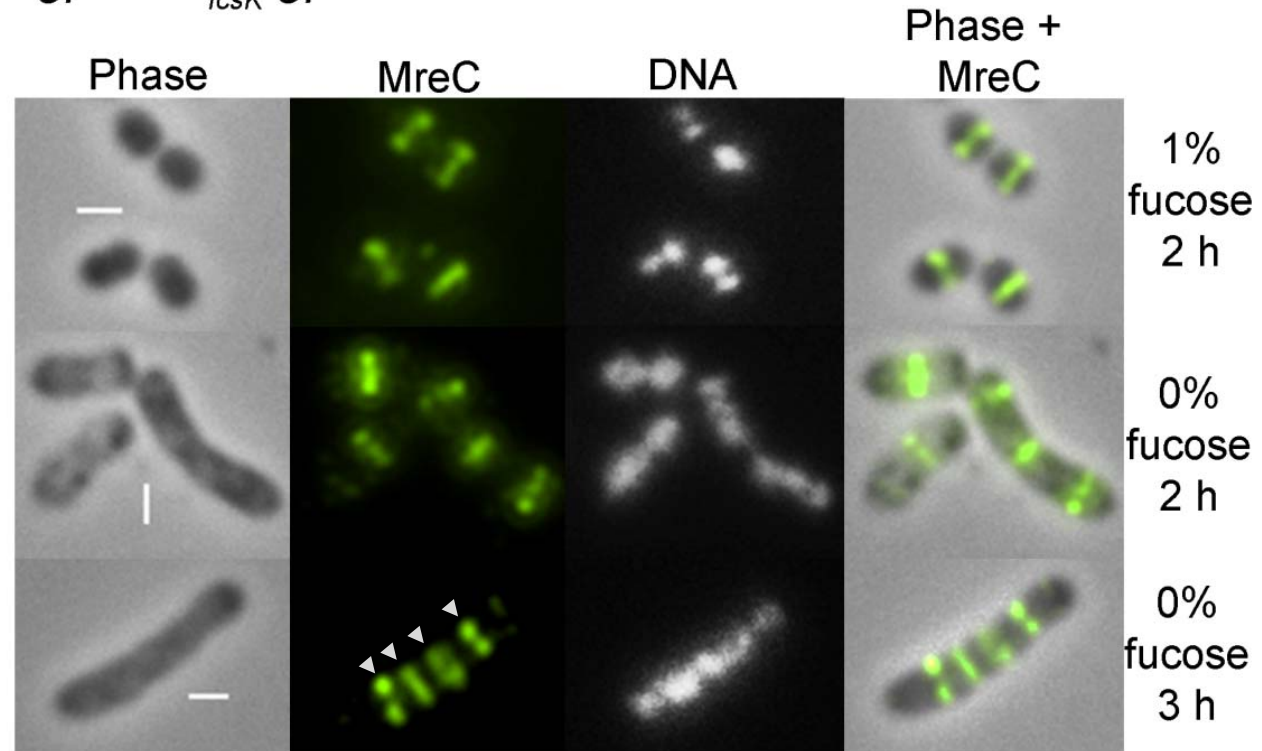

Fig. S11
